# Supplementary material for: Specific carotenoid pigments in the diet and a bit of oxidative stress in the recipe for producing red carotenoid-based signals
Source: PeerJ. 2016 Sep 1;4:e2237. doi: 10.7717/peerj.2237 (PMC5012267; doi:10.7717/peerj.2237)
Supplement: Supplemental Information 3 [file peerj-04-2237-s003.xlsx]

## Sheet: Mixed_21sept sin dicuat menos n
Ring	Eggs	Cage	Sex	Time	CAR	Plasma carot and vit session	Body mass	Tarsus length	Hematocrit	Eye ring hue	Eye ring Redness	Eye ring total brightness	Bill hue	Bill Redness	Bill total brightness	Leg hue	Leg redness	Chip hue	Chip redness	ALB	Albumin session	LDL	DiaLDL	Cholesterol	Cholesterol session	TRG	TRG session	UA	UA session	Lag time	Erythrocyte resistance	Erythrocyte resistance session	PLAOX	PLAOX session	Plasma_MDA	Plasma MDA session	Plasma retinol	Plasma tocopherol	Plasma lutein	Plasma Zeaxanthin
A365	0	261	F	1	control	41313	386	42.63	47	0.297247	0.702753	882.56	0.20072	0.79928	527.453	9.08426	10.9157	3.49746	16.5025	15	41390	13	41390	125	41390	102	41390	5.17	41390	72	61	41011	0.496175	9	3.91215	41260	0.0188608	0.00790759	0.00729354	0.00495844
A369	0	366	M	1	LZ	41313	429	44.7	42	0.231227	0.768773	684.75	0.24386	0.75614	676.44	5.98563	14.0144	3.7981	16.2019	20	41390	55	41390	212	41390	373	41390	5.23	41390	66	90	41011	0.547977	9	5.58611	41260	0.0220519	0.0220257	0.0243452	0.0116792
A370	0	382	M	1	LZ	41313	445	43.67	47	0.192881	0.807119	831.973	0.248187	0.751813	631.393	7.48736	12.5126	3.49299	16.507	17	41393	64	41393	220	41393	426	41393	6.06	41393	148	58	41011	0.398144	4	4.87522	41260	0.022541	0.0201105	0.0228784	0.0110627
A371	0	279	F	1	ASTA	41313	415	42.86	56	0.189821	0.810179	632.493	0.224475	0.775525	604.16	4.94439	15.0556	3.2598	16.7402	21	41390	41	41390	268	41390	218	41390	6.26	41390	136	52	41011	0.419672	9	4.58051	41260	0.0250942	0.0279576	0.0263625	0.011496
A376	0	360	F	1	LZ	41313	360	39.78	41	0.277446	0.722554	538.43	0.237076	0.762924	559.943	12.9163	7.08373	3.84453	16.1555	20	41390	125	41390	233	41390	216	41390	3.84	41390	128	54	41011	0.731148	8	5.59027	41260	0.0277262	0.0175451	0.0118071	0.00683554
A377	0	354	M	1	ZL	41313	398	45.25	47	0.280526	0.719474	558.493	0.226824	0.773176	493.453	10.5022	9.49778	3.82771	16.1723	17	41396	168	41396	299	41396	1454	41396	5.95	41396	66	30	41011	0.503226	8	9.34305	41260	0.0216907	0.0261799	0.0148651	0.00780247
A380	0	354	F	1	ZL	41313	444	44.35	52	0.211207	0.788793	570.863	0.121647	0.878353	395.21	7.62759	12.3724	3.68063	16.3194	18	41390	62	41390	220	41390	144	41390	6.58	41390	152	50	41011	0.613825	8	3.60603	41260	0.0240915	0.00910257	0.016848	0.00921147
A381	0	371	F	1	LZ	41313	364	43.07	48	0.233567	0.766433	614.843	0.164651	0.835349	488.387	9.73847	10.2615	3.86489	16.1351	20	41393	103	41393	246	41393	463	41393	8.26	41393	124	42	41010	0.551276	4	3.7172	41260	0.0271136	0.0240708	0.0191186	0.0078706
A388	0	356	F	1	control	41313	338	38.34	54	0.205276	0.794724	840.927	0.226018	0.773982	627.207	6.4175	13.5825	3.78506	16.2149											120	77	41011			6.00395	41260	0.023258	0.0220768	0.0287785	0.0144821
A397	0	259	M	1	ASTA	41313	429	41.47	52	0.239673	0.760327	805.207	0.245663	0.754337	608.783	9.10347	10.8965	3.36727	16.6327	19	41390	33	41390	197	41390	200	41390	4.39	41390	154	55	41011			4.80988	41260	0.0222115	0.0134463	0.0207338	0.00970756
A398	0	364	F	1	ZL	41313	406	41.37	54	0.22371	0.77629	670.983	0.187218	0.812782	495.07	8.31253	11.6875	3.67338	16.3266	15	41388	46	41388	173	41388	253	41388	4.18	41388	146	48	41011	0.294143	4	3.96832	41260	0.0235273	0.0218452	0.0228051	0.0109026
A399	0	256	F	1	control	41313	334	38.56	40	0.171442	0.828558	692.453	0.16475	0.83525	497.653	7.11144	12.8886	3.23993	16.7601	16	41388	50	41388	183	41388	240	41388	7.03	41388	152	61	41011	0.567462	4	3.6343	41260	0.0226467	0.023525	0.0239436	0.0101333
A400	0	362	F	1	control	41323	369	42.98	50	0.271158	0.728842	637.683	0.242118	0.757882	498.447	9.83475	10.1652	3.90221	16.0978	17	41388	19	41388	127	41388	132	41388	4.58	41388	158	48	41011	0.467562	1	4.94266	41260	0.0263277	0.0135213	0.0175995	0.0100848
A423	0	316	M	1	ZL	41316	467	49.38	47	0.23895	0.76105	976.25	0.184282	0.815718	432.94	7.04255	12.9575	3.90039	16.0996	20	41390	78	41390	233	41390	247	41390	5.33	41390	152	61	41010	0.447926	10	2.35888	41260	0.0226842	0.0194149	0.0207803	0.0104436
A427	0	320	F	1	LZ	41316	404	45.64	49	0.211114	0.788886	657.217	0.183163	0.816837	463.54	6.9056	13.0944	3.62808	16.3719	19	41390	22	41390	166	41390	197	41390	4.14	41390	126	65	41010	0.453503	9	4.66748	41260	0.0259513	0.0140764	0.0166591	0.00836206
A428	0	380	M	1	ZL	41323	448	46.9	52	0.220889	0.779111	704.153	0.2734	0.7266	525.253	7.96962	12.0304	3.73515	16.2648	21	41394	59	41394	213	41394	198	41394	6.39	41394	120	49	41011	0.526503	2	3.54235	41260	0.0244539	0.0279889	0.018492	0.0072151
A429	0	309	M	1	control	41323	496	46.98	54	0.280483	0.719517	846.117	0.205614	0.794386	437.067	6.43459	13.5654	3.86843	16.1316	24	41388	81	41388	331	41388	264	41388	8.38	41388	124	60	41010	0.553437	2	6.41424	41260	0.0262358	0.0231586	0.0216052	0.0105718
A432	0	283	M	1	control	41320	532	47.82	47	0.246328	0.753672	590.403	0.197872	0.802128	339.263	9.65772	10.3423	3.31518	16.6848	22	41388	131	41388	357	41388	162	41388	9.62	41388	154	61	41011	0.645553	4	3.91406	41260	0.0241039	0.0168615	0.0225384	0.0112326
A433	0	322	F	1	ASTA	41320	369	42.34	51	0.220313	0.779687	759.683	0.130344	0.869656	384.543	6.82569	13.1743	3.70459	16.2954	22	41393	43	41393	248	41393	259	41393	3.39	41393	142	55	41010	0.342459	4	3.50029	41260	0.0303004	0.0233342	0.0233819	0.00895488
A437	0	309	F	1	control	41313	386	42.47	45	0.278506	0.721494	606.86	0.251696	0.748304	502.053	12.025	7.97504	3.48615	16.5139	23	41390	71	41390	196	41390	286	41390	7.64	41390	104	54	41010	0.485662	12	3.03481	41260	0.0275415	0.0124809	0.00980815	0.00638812
A439	0	320	M	1	LZ	41316	482	46.42	51	0.239672	0.760328	721.963	0.215348	0.784652	460.69	9.07476	10.9252	3.59847	16.4015	19	41390	55	41390	237	41390	218	41390	3.88	41390	122	40	41010	0.377778	8	4.63	41260	0.0271587	0.0134795	0.0163275	0.0086339
A445	0	307	F	1	ASTA	41320	409	42.31	47	0.274811	0.725189	935.353	0.195316	0.804684	420.983	11.8065	8.19348	3.5601	16.4399	18	41389	93	41389	223	41389	242	41389	4.93	41389	152	50	41010	0.373931	12	3.51239	41260	0.0217784	0.0198305	0.0196609	0.00938167
A449	0	291	F	1	ASTA	41323	427	44.81	50	0.296844	0.703156	603.45	0.230267	0.769733	475.633	9.20735	10.7926	3.24971	16.7503	24	41393	113	41393	297	41393	363	41393	7.4	41393	120	51	41010	0.469023	1	5.33809	41260	0.0299469	0.0245428	0.0248321	0.0118416
A450	0	322	M	1	ASTA	41313	497	49.47	47	0.221288	0.778712	668.893	0.278521	0.721479	474.397	8.3645	11.6355	3.50733	16.4927	20	41390	49	41390	148	41390	180	41390	11.43	41390	63	58.5	41010	0.460853	11	5.26076	41260	0.0160195	0.0174035	0.0158979	0.00806358
A451	0	317	F	1	ASTA	41323	390	45.97	39	0.234114	0.765886	696.543	0.21086	0.78914	467.51	8.84712	11.1529	3.62513	16.3749	11	41388	35	41388	128	41388	129	41388	3.94	41388	123	75.5	41010	0.525144	1	6.27327	41260	0.0240849	0.0204524	0.0175971	0.00877667
A453	0	363	F	1	ASTA	41323	388	46.02	48	0.257527	0.742473	740.883	0.18624	0.81376	444.393	8.92689	11.0731	3.24833	16.7517	14	41388	36	41388	164	41388	216	41388	4.02	41388	122	43	41011	0.456549	2	4.02736	41260	0.024926	0.0158421	0.0173829	0.00764111
A455	0	304	F	1	control	41323	381	47.26	49	0.273239	0.726761	491.967	0.213722	0.786278	449.28	10.7686	9.23135	3.72518	16.2748	16	41388	65	41388	175	41388	127	41388	3.83	41388	82	21.5	41010	0.481497	2	3.84568	41260	0.0235565	0.0132624	0.0167787	0.00863875
A458	0	380	F	1	ZL	41323	365	43.25	49	0.201006	0.798994	712.687	0.273552	0.726448	776.463	7.35036	12.6496	3.87244	16.1276	16	41388	101	41388	245	41388	165	41388	3.34	41388	132	53	41011	0.370992	2	4.31988	41260	0.0298011	0.0210255	0.0190831	0.00930784
A459	0	363	M	1	ASTA	41316	460	48.73	50	0.212669	0.787331	565.6	0.221951	0.778049	610.36	5.46262	14.5374	3.47664	16.5234	19	41393	46	41393	213	41393	415	41393	8.25	41393	62	58	41011	0.370302	4	2.63571	41260	0.0276154	0.0143643	0.0202332	0.00992866
A480	0	294	M	1	control	41323	425	43.82	49	0.245772	0.754228	697.647	0.212512	0.787488	494.683	10.2723	9.72774	3.48482	16.5152	12	41388	37	41388	148	41388	132	41388	3.68	41388	104	40	41010	0.461723	1	3.17669	41260	0.0231778	0.014045	0.0200887	0.00975262
A482	0	382	F	1	LZ	41323	417	43.34	51	0.183772	0.816228	507.66	0.199792	0.800208	522.113	8.44673	11.5533	4.02484	15.9752	16	41388	55	41388	215	41388	123	41388	8.19	41388	72	87	41011	0.606012	1	3.92912	41260	0.0233781	0.019656	0.0270093	0.0127307
A483	0	278	M	1	ZL	41323	414	43.31	51	0.245246	0.754754	979.14	0.174636	0.825364	485.193	8.15498	11.845	3.31821	16.6818	16	41388	45	41388	247	41388	166	41388	6.86	41388				0.626432	1	4.01927	41260	0.0265353	0.0209448	0.0236936	0.0132185
A484	0	375	M	1	ZL	41316	486	47.61	45	0.195422	0.804578	670.803	0.196806	0.803194	635.24	6.12421	13.8758	3.51407	16.4859	18	41390	53	41390	204	41390	154	41390	5.38	41390	124	30	41010	0.500256	8	3.9659	41260	0.0274988	0.0157806	0.0219537	0.0105699
A485	0	270	F	1	control	41316	345	38.83	42	0.212576	0.787424	874.01	0.194879	0.805121	571.873	11.8762	8.12375	3.65657	16.3434	16	41390	52	41390	183	41390	93	41390	3.1	41390	156	66	41011	0.353825	11	4.97334	41260	0.0206495	0.00864968	0.0123239	0.00702342
A490	0	355	M	1	LZ	41323	440	47.09	50	0.211946	0.788054	649.113	0.184028	0.815972	495.9	8.13875	11.8612	3.84442	16.1556	21	41393	69	41393	300	41393	151	41393	5.68	41393	138	51	41011	0.312695	2	4.83017	41260	0.0248063	0.018507	0.0220062	0.01166
A491	0	257	M	1	LZ	41323	448	46.23	45	0.208004	0.791996	947.803	0.147013	0.852987	487.5	5.58794	14.4121	3.23232	16.7677	14	41388	30	41388	174	41388	100	41388	10.81	41388	68	53	41011	0.973961	4	4.35812	41260	0.0265918	0.0123788	0.018553	0.0116616
A493	0	359	M	1	ZL	41320	429	44.39	54	0.248169	0.751831	590.267	0.207365	0.792635	429.557	10.2165	9.78352	3.58922	16.4108	22	41388	33	41388	179	41388	128	41388	7.23	41388	160	61	41011	0.575207	3	2.95537	41260	0.0206821	0.0154081	0.0141299	0.00875055
A494	0	265	F	1	ZL	41316	393	42.07	44	0.214271	0.785729	528.317	0.1397	0.8603	505.93	6.57397	13.426	3.4844	16.5156	18	41390	25	41390	198	41390	131	41390	2.71	41390	144	64	41011	0.377494	8	2.78994	41260	0.0285353	0.0241265	0.0184627	0.0096565
A535	0	361	F	1	control	41320	338	39.19	48	0.242585	0.757415	866.613	0.195244	0.804756	510.87	6.70089	13.2991	4.1907	15.8093	18	41388	155	41388	282	41388	191	41388	4.99	41388	150	46	41011	0.334982	1	3.70258	41260	0.0249101	0.0293424	0.0262721	0.0117575
A568	0	358	F	1	ASTA	41320	400	42.6	44	0.25319	0.74681	714.99	0.226413	0.773587	559.777	9.46638	10.5336	3.91561	16.0844	25	41388	62	41388	230	41388	1392	41388	8.62	41388	122	41	41011	0.699174	3	13.6766	41260	0.0233099	0.0281863	0.0174582	0.0089087
A571	0	388	F	1	ASTA	41316	412	45.52	45	0.235876	0.764124	859.19	0.218339	0.781661	556.08	10.0867	9.91326	3.85662	16.1434	20	41393	98	41393	257	41393	200	41393	8.19	41393	122	57	41011	0.449772	5	2.46946	41256	0.0252349	0.0311616	0.0315242	0.0135696
A578	0	365	F	1	control	41320	424	43.16	58	0.237932	0.762068	792.12	0.128772	0.871228	427.997	8.72849	11.2715	4.04426	15.9557	18	41390	102	41390	232	41390	396	41390	10.87	41390	136	52	41011	0.664892	11	3.49609	41260	0.0252074	0.0305943	0.0207224	0.0106334
A716	0	256	M	1	control	41317	528	47.89	41	0.215846	0.784154	734.447	0.216338	0.783662	498.517	3.32173	16.6783	3.58631	16.4137	18	41393	47	41393	226	41393	377	41393	8.02	41393	154	57	41011	0.515167	3	2.86991	41261	0.0186502	0.0218486	0.0266845	0.012317
A717	0	267	M	1	LZ		467	45.81	49	0.250584	0.749416	925.117	0.147455	0.852545	513.853	4.17461	15.8254	3.57455	16.4254	19	41389	40	41389	181	41389	101	41389	4.28	41389
A718	0	257	F	1	LZ	41318	406	43.51	51	0.201758	0.798242	708.207	0.114286	0.885714	411.807	4.68125	15.3188	3.44379	16.5562	17	41388	25	41388	179	41388	108	41388	5.18	41388	122	50	41011	0.429653	17	5.24711	41261	0.0238578	0.0274646	0.0252078	0.0123594
A719	0	258	M	1	ZL	41306	460	46.45	45	0.23396	0.76604	705.867	0.232062	0.767938	735.423	7.12464	12.8754	3.6145	16.3855	23	41388	90	41388	268	41388	200	41388	11.17	41388	156	44	41011	0.625568	17	4.17449	41261	0.0164176	0.0112973	0.0146117	0.00853859
A720	0	258	F	1	ZL	41317	409	43.87	48	0.20942	0.79058	998.123	0.211444	0.788556	504.29	5.68541	14.3146	3.54687	16.4531	16	41388	61	41388	185	41388	218	41388	8.77	41388	138	52	41011			10.0817	41261	0.0230643	0.0175124	0.0235321	0.0101239
A721	0	259	F	1	ASTA	41317	394	41.42	46	0.224485	0.775515	585.607	0.133805	0.866195	456.693	6.21371	13.7863	3.49251	16.5075	17	41393	28	41393	155	41393	132	41393	7.82	41393	120	62	41011	0.578102	3	3.83076	41261	0.0219662	0.0196619	0.0198583	0.00910876
A724	0	261	M	1	control		474	45.58		0.1873	0.8127	965.55	0.151384	0.848616	465.037	6.66314	13.3369	3.57386	16.4261
A725	0	262	M	1	LZ	41318	427	41.85	49	0.254105	0.745895	797.183	0.297094	0.702906	728.303	7.46063	12.5394	3.46207	16.5379	19	41388	36	41388	200	41388	134	41388	6.12	41388	152	62	41011	0.467508	17	6.73174	41261	0.0260199	0.0152981	0.0183487	0.0106309
A726	0	262	F	1	LZ	41306	347	40.11	42	0.18054	0.81946	610.833	0.145623	0.854377	424.313	5.71668	14.2833	3.39046	16.6095	21	41389	55	41389	200	41389	100	41389	5.94	41389	152	58	41011	0.369231	18	3.95367	41261	0.0214027	0.0159322	0.017571	0.00934335
A727	3	263	M	1	ZL	41305	555	46.78	50	0.180038	0.819962	767.337	0.131997	0.868003	437.81	5.36967	14.6303	3.6018	16.3982	21	41390	70	41390	237	41390	266	41390	6.11	41390	188	56	41011	0.437128	12	7.78307	41261	0.0224244	0.020859	0.0258063	0.012063
A728	3	263	F	1	ZL	41306	415	44.63	44	0.202762	0.797238	753.47	0.168233	0.831767	540.25	4.39556	15.6044	3.49426	16.5057	21	41390	34	41390	145	41390	775	41390	6.75	41390	50	49	41011	0.4125	17	6.11592	41261	0.0191667	0.00592693	0.00698294	0.00422655
A729	0	383	F	1	ZL	41317	443	43.26		0.154869	0.845131	662.273	0.184089	0.815911	464.927	4.07763	15.9224	3.40116	16.5988	18	41393	64	41393	193	41393	277	41393	9.73	41393				0.623136	3	3.68482	41261	0.0225613	0.0147126	0.0136669	0.0128087
A731	0	265	M	1	ZL	41305	445	46.39	48	0.246702	0.753298	921.65	0.149167	0.850833	612.207	3.13283	16.8672	3.37895	16.6211	20	41389	83	41389	245	41389	128	41389	6.22	41389	146	49	41011			6.58762	41261	0.0193332	0.0172526	0.023471	0.00966909
A732	0	266	M	1	control	41312	396	43.16	53	0.160652	0.839348	773.663	0.181932	0.818068	485.663	5.99306	14.0069	3.57729	16.4227	27	41389	75	41389	276	41389	148	41389	6.67	41389	122	45	41011	0.420225	11	6.23762	41262	0.0250571	0.0286829	0.0283981	0.0150267
A733	0	381	F	1	LZ	41317	358	40.31	57	0.196218	0.803782	687.07	0.227002	0.772998	662.153	8.62053	11.3795	3.45169	16.5483	15	41393	197	41393	326	41393	104	41393	18.3	41393	90	48	41011			6.97919	41261	0.0196153	0.0241485	0.0163345	0.00998983
A734	0	267	F	1	LZ	41306	397	43.19	46	0.24273	0.75727	794.387	0.167773	0.832227	491.193	6.01015	13.9899	3.36133	16.6387	16	41389	50	41389	138	41389	93	41389	3.92	41389	154	72	41011			2.66159	41262	0.0148162	0.0103448	0.0113583	0.00580453
A735	0	266	F	1	control	41320	382	44.15	52	0.193344	0.806656	626.303	0.141793	0.858207	430.183	6.07993	13.9201	3.38061	16.6194	20	41388	205	41388	278	41388	316	41388	3.66	41388	66	44	41011	0.334463	2	5.07793	41260	0.0221451	0.0230155	0.0202557	0.00920624
A736	0	268	F	1	ZL	41316	414	42.43	51	0.237229	0.762771	670.067	0.181485	0.818515	433.357	6.47176	13.5282	3.09483	16.9052	18	41393	189	41393	424	41393	1526	41393	10.04	41393	166	38	41011	0.577238	5	6.52923	41256	0.0214411	0.0565955	0.0271448	0.012558
A737	0	268	M	1	ZL	41312	424	47	46	0.215121	0.784879	470.937	0.198315	0.801685	552.283	7.5983	12.4017	3.45284	16.5472	19	41389	63	41389	215	41389	194	41389	4.74	41389	150	46	41011	0.358514	14	7.58536	41262	0.0163147	0.0128605	0.0137061	0.00789229
A738	0	269	F	1	ASTA	41317	401	42.12	50	0.200846	0.799154	767.483	0.170826	0.829174	496.753	7.42093	12.5791	3.38399	16.616	20	41388	88	41388	189	41388	367	41388	4.86	41388	120	61	41011	0.433773	3	3.36183	41261	0.0289115	0.025726	0.0183425	0.00910602
A739	0	269	M	1	ASTA	41306	408	45.13	52	0.20739	0.79261	831.743	0.12855	0.87145	456.243	3.97266	16.0273	3.17661	16.8234	22	41389	64	41389	223	41389	116	41389	3.47	41389	100	38	41011	0.395222	11	3.09231	41262	0.0231035	0.0152676	0.0156702	0.00904761
A740	0	272	M	1	LZ	41320	476	49.79	57	0.208182	0.791818	677.91	0.148598	0.851402	466.91	6.149	13.851	3.50785	16.4922	23	41394	140	41394	328	41394	116	41394	6.45	41394	98	71	41011	0.511565	1	2.52248	41260	0.026846	0.0291806	0.0309621	0.0145982
A741	0	272	F	1	LZ	41318	404	46.65	48	0.203735	0.796265	592.797	0.138451	0.861549	553.173	3.97071	16.0293	3.05419	16.9458	19	41388	78	41388	226	41388	117	41388	3.82	41388	88	54	41011	0.401233	18	3.48313	41261	0.0274687	0.0315774	0.0266439	0.0123153
A743	0	274	F	1	ASTA	41317	452	44.29	43	0.207616	0.792384	887.827	0.133924	0.866076	433.6	6.72596	13.274	3.40146	16.5985	19	41393	168	41393	275	41393	680	41393	4.33	41393	70	74	41011			6.77746	41261	0.0268985	0.0183793	0.0147229	0.00887207
A744	0	274	M	1	ASTA	41320	436	43.4	44	0.193012	0.806988	805.587	0.235141	0.764859	774.09	5.72613	14.2739	3.34221	16.6578	23	41388	73	41388	250	41388	189	41388	4.64	41388	132	45	41011	0.295009	1	2.89838	41260	0.0261192	0.0192669	0.0224603	0.0115729
A745	0	275	M	1	LZ	41317	444	49.05	47	0.171509	0.828491	562.207	0.162668	0.837332	486.82	3.95908	16.0409	3.48123	16.5188	17	41393	57	41393	187	41393	107	41393	8.34	41393	154	24	41011	0.64451	18	3.19207	41261	0.0283121	0.0165868	0.0188803	0.00966282
A746	0	275	F	1	LZ	41312	422	44.07	42	0.240219	0.759781	686.45	0.191111	0.808889	458.6	9.80935	10.1906	3.41308	16.5869	22	41389	68	41389	255	41389	119	41389	4	41389	148	47	41011	0.292015	14	3.22393	41262	0.0306067	0.023122	0.0269385	0.0123754
A747	0	288	M	1	control	41312	469	47.49	55	0.197703	0.802297	539.663	0.122048	0.877952	445.753	4.52555	15.4744	3.27132	16.7287	19	41389	50	41389	227	41389	178	41389	7.66	41389	156	60	41011	0.731524	12	3.4917	41262	0.0270164	0.0199911	0.0259148	0.0131373
A748	0	271	F	1	ASTA	41312	395	44.48	48	0.23597	0.76403	800.93	0.179588	0.820412	505.437	5.84837	14.1516	3.25901	16.741	22	41389	110	41389	309	41389	161	41389	5	41389	138	51	41011	0.415466	15	3.0006	41262	0.0284709	0.0285824	0.0198382	0.0100315
A749	0	270	M	1	control	41306	455	46.63	58	0.213232	0.786768	611.453	0.210785	0.789215	558.09	4.79092	15.2091	3.13139	16.8686	19	41388	53	41388	250	41388	133	41388	6.19	41388	158	62	41011	0.437971	19	4.68646	41261	0.0204744	0.0175145	0.0201269	0.00938581
A750	0	278	F	1	ZL	41309	370	42.8	38	0.160564	0.839436	949.967	0.152566	0.847434	524.997	6.8324	13.1676	3.41804	16.582	19	41388	84	41388	244	41388	1367	41388	3.96	41388	110	41	41011	0.444741	17	8.22886	41261	0.019731	0.0148783	0.0108837	0.00615985
A751	0	279	M	1	ASTA	41320	365	41.43	47	0.221668	0.778332	565.007	0.173698	0.826302	608.91	7.83162	12.1684	3.60949	16.3905	21	41388	114	41388	251	41388	136	41388	8.15	41388	156	59	41011	0.447007	2	1.84645	41260	0.0173177	0.0211508	0.0147455	0.00913416
A753	0	298	F	1	ASTA	41305	385	43.61	53	0.176568	0.823432	576.217	0.183627	0.816373	569.517	5.64674	14.3533	3.63934	16.3607	22	41390	53	41390	219	41390	352	41390	6.4	41390	158	58	41010	0.885124	13	6.39616	41261	0.0216189	0.0228741	0.0240356	0.0125964
A754	0	283	F	1	control	41305	411	43.64	46	0.221733	0.778267	924.103	0.217486	0.782514	598.033	7.13855	12.8614	3.52661	16.4734	27	41390	59	41390	272	41390	220	41390	5.61	41390	132	50	41011	0.428283	12	6.36581	41261	0.0187514	0.0256378	0.0243573	0.0112337
A755	0	284	M	1	LZ	41309	456	48.05	54	0.185077	0.814923	467.583	0.14582	0.85418	492.797	4.75289	15.2471	3.38719	16.6128	22	41388	58	41388	255	41388	127	41388	5.84	41388	70	56	41011	0.494825	17	3.13117	41261	0.018439	0.0254242	0.0217082	0.0120417
A756	0	284	F	1	LZ	41318	408	44.56	41	0.219043	0.780957	610.167	0.163279	0.836721	436.51	5.62857	14.3714	3.45037	16.5496	15	41388	45	41388	191	41388	1091	41388	3.71	41388	144	36	41011	0.509639	18	12.9456	41261	0.0226868	0.0111287	0.00906077	0.00523423
A757	0	273	M	1	ZL	41317	455	48.81	42	0.232955	0.767045	654.67	0.220139	0.779861	471.467	6.32233	13.6777	3.18287	16.8171	18	41393	98	41393	278	41393	159	41393	5.55	41393	90	47	41011	0.383042	4	4.04999	41261	0.0234406	0.0276739	0.0251074	0.0115738
A758	0	286	M	1	ASTA	41312	442	46.08	58	0.183763	0.816237	371.85	0.155101	0.844899	398.047	7.40348	12.5965	3.47352	16.5265	19	41389	73	41389	249	41389	177	41389	8.22	41389	164	57	41011	0.523599	15	4.93915	41262	0.0307431	0.0198729	0.0248968	0.0114881
A759	0	287	M	1	ZL	41312	455	45.1	46	0.197325	0.802675	727.63	0.152703	0.847297	423.963	5.72438	14.2756	3.42868	16.5713	21	41389	104	41389	288	41389	258	41389	7.89	41389	106	63	41011	0.542966	14	4.52861	41262	0.0301277	0.0278671	0.0204962	0.00920208
A760	0	287	F	1	ZL	41312	372	45.06	41	0.189284	0.810716	605.197	0.172419	0.827581	488.027	5.98612	14.0139	3.3416	16.6584	19	41389	92	41389	208	41389	263	41389	7.19	41389	168	66	41011	0.511765	11	2.58065	41262	0.0192633	0.0307682	0.0221168	0.011132
A761	0	276	F	1	control	41317	369	44.71	49	0.208736	0.791264	650.88	0.206434	0.793566	535.19	7.51455	12.4855	3.42452	16.5755	20	41393	132	41393	302	41393	170	41393	7.3	41393	134	40	41011	0.404452	18	2.74465	41261	0.0319784	0.0197356	0.0197141	0.0101976
A762	0	288	F	1	control	41311	401	44.19	48	0.22818	0.77182	545.95	0.175247	0.824753	496.733	10.6174	9.38261	3.19339	16.8066	20	41390	69	41390	194	41390	194	41390	7.21	41390	144	56	41011	0.6	14	4.09912	41262	0.0222716	0.0200889	0.0217848	0.010845
A763	0	289	F	1	LZ	41309	386	42.25	47	0.20421	0.79579	529.223	0.168493	0.831507	403.673	5.80591	14.1941	3.56603	16.434	23	41388	77	41388	263	41388	191	41388	6.33	41388	156	65	41011	0.32879	17	4.69085	41261	0.0222899	0.0225803	0.00575803	0.0104309
A764	0	289	M	1	LZ	41320	433	45.15	50	0.157125	0.842875	711.29	0.111557	0.888443	338.737	4.58996	15.41	3.35144	16.6486	24	41388	48	41388	287	41388	192	41388	9.28	41388	154	49	41011	0.458757	2	2.73389	41260	0.0261127	0.0297964	0.0348636	0.0152508
A765	0	290	F	1	ZL	41317	418	45.98	42	0.214441	0.785559	656.347	0.169477	0.830523	402.3	8.243	11.757	3.50768	16.4923	18	41393	33	41393	130	41393	136	41393	6.02	41393	124	72	41011	0.604471	18	2.28307	41261	0.026697	0.0180068	0.0210176	0.0107426
A766	0	290	M	1	ZL	41312	471	47.45	54	0.210485	0.789515	676.287	0.139176	0.860824	446.317	6.45528	13.5447	3.57171	16.4283	21	41389	95	41389	262	41389	119	41389	7.5	41389	120	54	41011	0.831733	12	5.21601	41262	0.0226726	0.0297203	0.0325725	0.0134065
A770	0	294	F	1	control	41311	424	44.5	48	0.196765	0.803235	452.79	0.148263	0.851737	412.84	6.20665	13.7934	3.26715	16.7328	26	41389	24	41389	214	41389	270	41389	7.24	41389	136	52	41010	0.572274	14	3.31928	41262	0.0312992	0.0226341	0.0277062	0.012611
A771	0	293	F	1	control		387	43.43	45	0.306466	0.693534	563.273	0.225559	0.774441	472.347	12.1691	7.8309	3.07804	16.922											121	56.5	41010	0.420399	2
A772	0	295	M	1	LZ	41309	529	47.08	56	0.168858	0.831142	586.277	0.135381	0.864619	427.437	4.43705	15.5629	3.44336	16.5566	23	41388	72	41388	290	41388	256	41388	6.19	41388	96	46	41010	0.401205	18	3.29489	41261	0.0218215	0.0419163	0.0324958	0.0124845
A773	0	295	F	1	LZ	41305	420	43.34	48	0.202712	0.797288	482.627	0.150847	0.849153	529.02	5.73611	14.2639	3.39714	16.6029	20	41389	49	41389	265	41389	292	41389	7.23	41389	136	24.5	41010	0.627726	11	7.41584	41261	0.0244386	0.0419706	0.029425	0.013843
A774	0	296	M	1	ZL	41306	447	48.31	43	0.18059	0.81941	561.267	0.164161	0.835839	491.42	5.77988	14.2201	3.65643	16.3436	15	41389	38	41389	172	41389	133	41389	3.96	41389	124	42	41010	0.334463	12	5.79349	41262	0.0173726	0.00996127	0.0135211	0.00716592
A775	0	296	F	1	ZL	41316	368	41.89	39	0.133532	0.866468	770.713	0.131542	0.868458	586.207	6.0542	13.9458	3.5218	16.4782	17	41388	44	41388	197	41388	334	41388	5.86	41388	86	41	41010			4.16784	41261	0.0278519	0.0251445	0.0263543	0.0138692
A776	0	297	M	1	ASTA	41312	445	47.18	54	0.232955	0.767045	887.597	0.179147	0.820853	524.007	5.80861	14.1914	3.19285	16.8071	26	41389	99	41389	341	41389	413	41389	7.21	41389	86	47	41010	0.489279	15	6.86666	41262	0.0324193	0.0162261	0.0164096	0.00871175
A777	0	297	F	1	ASTA	41318	423	44.5	51	0.182471	0.817529	863.06	0.164745	0.835255	440.177	4.75909	15.2409	3.3001	16.6999	21	41388	34	41388	224	41388	141	41388	3.81	41388	132	54	41010			4.74569	41261	0.0283079	0.0271538	0.020156	0.0111404
A778	0	298	M	1	ASTA	41318	486	48.1	47	0.190344	0.809656	439.2	0.152355	0.847645	453.653	5.75885	14.2412	3.31526	16.6847	19	41388	77	41388	243	41388	272	41388	12.15	41388	106	39	41010	0.917919	20	6.19968	41261	0.0271654	0.0255594	0.0311788	0.0129321
A780	0	306	M	1	ZL	41312	466	46.16	50	0.157603	0.842397	779.17	0.132485	0.867515	480.237	2.91826	17.0817	3.67866	16.3213	19	41389	78	41389	240	41389	319	41389	7.08	41389	114	39	41010	0.431919	15	6.18579	41262	0.0260945	0.0314549	0.0276288	0.0115081
A781	0	306	F	1	ZL	41312	415	45.76	53	0.24037	0.75963	750.76	0.109931	0.890069	376.933	4.08735	15.9127	3.75428	16.2457	19	41389	183	41389	321	41389	1474	41389	4	41389	132	25.5	41010	0.367802	14	10.4226	41262	0.0216428	0.0308307	0.0189288	0.0124048
A782	0	300	M	1	LZ	41311	440	45.7	48	0.198524	0.801476	746.757	0.160656	0.839344	482.217	5.14814	14.8519	3.2003	16.7997	22	41389	31	41389	224	41389	217	41389	7.76	41389	78	48	41010	0.738632	14	3.81936	41262	0.0243231	0.0104201	0.0205651	0.0122491
A783	0	300	F	1	LZ	41306	462	44.79	40	0.236443	0.763557	772.937	0.153755	0.846245	412.557	7.25781	12.7422	3.68113	16.3189	19	41389	192	41389	255	41389	328	41389	5.27	41389	112	41	41010	0.499804	12	5.15851	41262	0.0185835	0.020048	0.0159294	0.00771991
A784	0	377	F	1	control	41309	397	42.24	46	0.160574	0.839426	710.19	0.139615	0.860385	402.343	5.63875	14.3612	3.68871	16.3113	22	41388	348	41388	433	41388	1169	41388	12.99	41388	120	31	41011			7.24851	41261	0.0237517	0.0721761	0.0349723	0.0173974
A785	0	370	F	1	ZL	41318	384	43.51	51	0.206752	0.793248	492.313	0.1589	0.8411	438.383	9.32056	10.6794	3.52314	16.4769	18	41388	15	41388	137	41388	106	41388	5.01	41388	76	53.5	41010	0.448993	17	3.37009	41261	0.0233502	0.0136705	0.0171644	0.00819442
A788	0	285	M	1	ZL	41317	473	47.15	49	0.253312	0.746688	857.853	0.166219	0.833781	596.37	3.28706	16.7129	4.04589	15.9541	17	41393	117	41393	294	41393	210	41393	4.51	41393	122	43	41011	0.293267	4	2.29157	41261	0.0223722	0.0003664	0.00525386	0.00890808
A789	0	285	F	1	ZL	41305	357	40.5	42	0.181526	0.818474	487.253	0.173744	0.826256	397.293	7.59208	12.4079	3.75414	16.2459	16	41390	99	41390	224	41390	199	41390	6.98	41390	108	40	41011	0.285524	11	6.21953	41261	0.0208005	0.0239307	0.0220998	0.0100994
A790	1	301	M	1	ZL	41306	532	40.15	42	0.191262	0.808738	670.197	0.140471	0.859529	392.093	5.0572	14.9428	3.39855	16.6015	22	41390	53	41390	233	41390	469	41390	8.69	41390	76	70	41010	0.54599	18	4.26727	41261	0.0205408	0.017455	0.0171331	0.00985643
A791	1	301	F	1	ZL	41320	364	41.55	44	0.240655	0.759345	664.547	0.14957	0.85043	395.34	6.73751	13.2625	3.87729	16.1227	28	41388	60	41388	364	41388	1428	41388	7.56	41388	5	40.5	41010	0.527911	1	7.50304	41260	0.026553	0.0154086	0.0109374	0.00601661
A792	0	302	F	1	ASTA	41309	333	40.71	46	0.178985	0.821015	729.033	0.150389	0.849611	461.723	7.46266	12.5373	4.5183	15.4817	19	41388	265	41388	350	41388	978	41388	7.61	41388	116	43	41010	0.507534	19	5.61377	41261	0.0192462	0.0339939	0.00539986	0.0111008
A793	0	302	M	1	ASTA	41306	431	47.72	48	0.180183	0.819817	728.887	0.150029	0.849971	456.903	5.99855	14.0015	3.9498	16.0502	20	41389	44	41389	182	41389	187	41389	10	41389	122	52	41010	0.967983	11	4.48743	41262	0.0184273	0.0163383	0.0141772	0.00865256
A794	0	304	M	1	control	41317	426	44.62	53	0.205933	0.794067	712.07	0.21401	0.78599	405.237	6.166	13.834	3.66016	16.3398	19	41393	74	41393	241	41393	238	41393	4.51	41393	116	36	41010			2.1528	41261	0.0261491	0.0287579	0.0209284	0.00989232
A795	0	305	F	1	LZ	41317	395	43.82	47	0.237019	0.762981	485.39	0.128971	0.871029	407.683	3.94127	16.0587	3.32535	16.6746	17	41388	63	41388	159	41388	1011	41388	3.82	41388				0.375216	18	12.2691	41261	0.0240653	0.0155404	0.0114993	0.00657257
A796	0	305	M	1	LZ	41318	405	43.67	48	0.198871	0.801129	900.31	0.155885	0.844115	381.71	6.55496	13.445	4.27498	15.725	21	41388	29	41388	254	41388	72	41388	4.72	41388	63	69.5	41010	0.378523	17	4.23312	41261	0.0315106	0.0296276	0.0248802	0.0120682
A797	0	375	F	1	ZL	41312	407	41.6	51	0.22274	0.77726	657.573	0.136005	0.863995	418.257	6.26094	13.7391	3.65365	16.3464	22	41389	108	41389	218	41389	423	41389	6.26	41389	104	40	41010	0.344939	12	4.86742	41262	0.022572	0.0281629	0.0203102	0.0107916
A798	0	372	F	1	control	41320	384	41.1	42	0.175354	0.824646	538.263	0.116489	0.883511	392.327	3.5826	16.4174	3.62635	16.3736	21	41393	78	41393	204	41393	283	41393	8.59	41393	138	60	41010	0.520705	3	4.02079	41261	0.0225209	0.0263958	0.0245102	0.0111572
A799	0	299	F	1	control	41305	372	44.13	51	0.216917	0.783083	603.407	0.150119	0.849881	453.823	4.13047	15.8695	3.81703	16.183	17	41389	37	41389	186	41389	225	41389	12.44	41389	78	23.5	41010	0.784211	13	3.97461	41262	0.0165443	0.0122412	0.0145086	0.00858913
A800	0	299	M	1	control	41317	458	43.79	51	0.186637	0.813363	653.403	0.145706	0.854294	400.47	7.36511	12.6349	3.85058	16.1494	23	41393	50	41393	262	41393	361	41393	7.07	41393	76	74	41010	0.519708	3	4.12625	41261	0.0252718	0.0197234	0.0255518	0.013286
B102	0	277	M	1	LZ	41324	505	48.14	48	0.228931	0.771069	869.823	0.172433	0.827567	540.023	5.18206	14.8179	3.2867	16.7133	19	41393	37	41393	220	41393	138	41393	6.78	41393	116	48	41011	0.431601	1	3.87104	41262	0.0233909	0.025284	0.0248616	0.0136142
B103	0	316	F	1	ZL	41305	375	42.5	42	0.220305	0.779695	677.28	0.13354	0.86646	444.237	5.44583	14.5542	3.71758	16.2824	21	41396	46	41396	232	41396	216	41396	7.4	41396	144	51	41010			5.43537	41263	0.0228576	0.0274755	0.0331181	0.0128644
B104	0	317	M	1	ASTA	41310	421	43.99	55	0.186229	0.813771	343.26	0.157414	0.842586	453.593	5.85954	14.1405	3.90588	16.0941	17	41396	19	41396	192	41396	237	41396	6.02	41396						4.77132	41263	0.0270242	0.0269725	0.0282483	0.0125212
B105	0	366	F	1	LZ	41323	371	42.17	45	0.193392	0.806608	386.997	0.188731	0.811269	476.267	6.23022	13.7698	3.70467	16.2953	18	41393	149	41393	283	41393	214	41393	3.47	41393	148	52	41011	0.315415	15	3.81465	41262	0.0264546	0.0193843	0.018346	0.0105363
B106	0	308	F	1	control	41316	358	42.55		0.271739	0.728261	925.697	0.177696	0.822304	441.17	6.0939	13.9061	3.87464	16.1254	20	41390	116	41390	236	41390	742	41390	6.38	41390	120	51	41010	0.42716	8	3.70877	41260	0.0251752	0.0229343	0.0225035	0.0124778
B107	0	308	M	1	control	41304	487	45.88	51	0.184134	0.815866	650.607	0.185425	0.814575	507.67	7.7154	12.2846	4.0935	15.9065	28	41394	79	41394	248	41394	326	41394	6.2	41394	136	58	41010	0.439506	6	6.19361	41263	0.02118	0.0202411	0.0228002	0.010061
B108	0	314	M	1	control	41311	455	45.67	50	0.196895	0.803105	796.75	0.113102	0.886898	336.4	4.91914	15.0809	3.83013	16.1699	24	41394	94	41394	370	41394	305	41394	5.6	41394	126	59	41010	0.452292	6	4.37948	41263	0.0271769	0.0285275	0.0248801	0.0129548
B109	0	314	F	1	control	41323	397	43.5	51	0.203223	0.796777	477.863	0.164061	0.835939	368.117	9.74498	10.255	3.91636	16.0836	20	41393	45	41393	218	41393	300	41393	6.66	41393				0.528854	15	4.88454	41262	0.0279335	0.0176186	0.0211207	0.0111171
B110	0	307	M	1	ASTA	41304	495	46.17	48	0.172637	0.827363	445.637	0.196619	0.803381	556.867	5.32457	14.6754	3.61734	16.3827	21	41394	39	41394	219	41394	264	41394	7.19	41394	124	49	41010	0.501734	9	4.71914	41263	0.0184625	0.0148179	0.0194184	0.0109721
B112	0	318	M	1	LZ	41324	490	44.71	58	0.216113	0.783887	623.31	0.180281	0.819719	452.807	4.76882	15.2312	3.57597	16.424	20	41393	90	41393	243	41393	254	41393	6.99	41393	128	28.5	41010	0.713586	14	4.6542	41262	0.0294834	0.0169744	0.0202146	0.0101652
B114	0	312	F	1	ASTA	41324	381	43.95	51	0.200773	0.799227	607.103	0.13416	0.86584	449.823	4.86015	15.1399	3.95712	16.0429	22	41393	33	41393	204	41393	248	41393	6.37	41393	132	54	41010	0.501961	15	4.70218	41262	0.0229489	0.0208742	0.0220801	0.0113616
B115	0	312	M	1	ASTA	41324	450	45.09	54	0.211054	0.788946	738.373	0.144184	0.855816	494.84	4.11879	15.8812	3.81193	16.1881	19	41393	77	41393	236	41393	303	41393	6.8	41393	84	60	41010			3.76764	41262	0.0193482	0.0181415	0.0188675	0.00967546
B116	2	315	M	1	LZ	41310	422	45.05	45	0.203564	0.796436	560.177	0.160429	0.839571	449.393	9.09003	10.91	3.72907	16.2709	18	41393	85	41393	251	41393	215	41393	4.24	41393	168	37.5	41010	0.37707	7	3.5769	41263	0.0214466	0.0270321	0.0203684	0.0098477
B117	2	315	F	1	LZ	41311	413	46.02	48	0.166349	0.833651	579.023	0.191223	0.808777	400.68	5.86409	14.1359	3.77696	16.223	21	41394	65	41394	580	41394	1658	41394	9.01	41394						19.2185	41263	0.0394608	0.0418015	0.0165971	0.00807917
B119	2	310	M	1	LZ	41324	483	46.54	54	0.144102	0.855898	637.453	0.110312	0.889688	395.27	3.77766	16.2223	3.23927	16.7607	19	41393	52	41393	229	41393	123	41393	4	41393	120	52	41010	0.486555	14	5.62727	41262	0.0201088	0.0158413	0.0198497	0.0100522
B120	0	311	F	1	ZL	41324	370	43.75	45	0.209542	0.790458	618.667	0.205805	0.794195	515.727	5.49685	14.5031	3.6371	16.3629	16	41393	66	41393	154	41393	445	41393	3.38	41393	125	59	41010	0.47395	14	4.7191	41262	0.0209611	0.0224691	0.0174616	0.00818096
B121	0	311	M	1	ZL	41309	460	46	58	0.186313	0.813687	313.423	0.230988	0.769012	397.67	5.52021	14.4798	3.71696	16.283	23	41394	27	41394	175	41394	81	41394	6.22	41394	164	62	41010			3.26724	41263	0.0171812	0.0168862	0.0215604	0.0117288
B122	0	293	M	1	control	41311	449	47.55	49	0.198005	0.801995	601.753	0.153493	0.846507	414.573	5.81992	14.1801	3.24405	16.7559	19	41394	79	41394	230	41394	276	41394	5.93	41394	114	50	41010	0.533868	5	3.01407	41263	0.0270875	0.0269478	0.0208707	0.0101436
B123	0	276	M	1	control	41311	447	45.74	45	0.171956	0.828044	736.55	0.119322	0.880678	368.157	7.47771	12.5223	3.73422	16.2658	23	41390	66	41390	270	41390	182	41390	10.61	41390	122	60	41010	0.469565	15	2.51858	41262	0.0215727	0.028499	0.0232396	0.01023
B124	0	386	M	1	ZL	41310	487	47.66	48	0.190115	0.809885	564.943	0.133632	0.866368	468.33	5.05899	14.941	3.55583	16.4442	19	41394	66	41394	213	41394	251	41394	5.75	41394	158	58	41011	0.51358	9	7.11262	41263	0.0195024	0.0145635	0.0206764	0.0092351
B125	0	386	F	1	ZL	41311	378	43.94	42	0.261696	0.738304	449.66	0.141008	0.858992	465.073	7.91203	12.088	3.57103	16.429	19	41389	133	41389	289	41389	1191	41389	4.25	41389	124	46	41011	0.258346	15	8.38417	41262	0.018791	0.037664	0.0219469	0.0116661
B126	0	381	M	1	LZ	41324	448	46.9	52	0.191681	0.808319	683.06	0.172363	0.827637	539.083	5.25974	14.7403	3.61969	16.3803	17	41393	34	41393	195	41393	146	41393	5.29	41393	164	55	41011	0.419876	14	3.73876	41262	0.021048	0.0206784	0.0241329	0.0109945
B127	0	388	M	1	ASTA	41326	470	47.94	49	0.197642	0.802358	466.323	0.215298	0.784702	680.803	4.9066	15.0934	3.50589	16.4941	20	41394	58	41394	214	41394	127	41394	5.27	41394	136	59	41010	0.383831	5	4.17602	41263	0.0230894	0.0163567	0.0214262	0.010597
B128	1	321	M	1	ZL	41304	452	45.69	54	0.18891	0.81109	490.063	0.13896	0.86104	411.117	4.55227	15.4477	3.33473	16.6653	26	41394	99	41394	305	41394	201	41394	7.29	41394	132	45	41010	0.588971	5	3.08932	41263	0.0295782	0.0310996	0.0302677	0.0128033
B129	0	384	F	1	control	41324	389	42.08	45	0.238751	0.761249	590.65	0.135344	0.864656	401.743	7.54924	12.4508	3.77242	16.2276	21	41393	164	41393	283	41393	392	41393	6.26	41393	136	48	41010	0.866129	15	6.19823	41262	0.024998	0.0254823	0.0221639	0.0112663
B130	0	384	M	1	control	41311	449	48.61	52	0.223198	0.776802	705.12	0.131724	0.868276	434.287	6.49862	13.5014	3.93682	16.0632	17	41390	97	41390	266	41390	243	41390	5.73	41390	148	52	41010	1.21765	16	5.43854	41262	0.0227551	0.0288483	0.0307768	0.012865
B131	0	387	F	1	LZ	41304	414	46.18	46	0.225585	0.774415	563.653	0.152755	0.847245	437.74	5.48747	14.5125	3.56843	16.4316	22	41394	42	41394	158	41394	488	41394	4.73	41394	138	23.5	41010			3.60079	41263	0.0213813	0.0149447	0.0159005	0.00774254
B132	0	387	M	1	LZ	41310	465	48.21	48	0.17469	0.82531	630.023	0.173342	0.826658	518.78	3.55654	16.4435	3.58072	16.4193	18	41394	66	41394	208	41394	343	41394	6.32	41394	148	50	41010	0.456549	6	15.5515	41263	0.0147975	0.0143291	0.0194725	0.0100149
B133	0	319	F	1	control	41311	400	44.09	49	0.192381	0.807619	776.597	0.222399	0.777601	639.533	5.91107	14.0889	3.60093	16.3991	22	41390	20	41390	186	41390	112	41390	6.86	41390	172	63	41010			3.51198	41262	0.024299	0.0228516	0.021642	0.0113777
B134	0	319	M	1	control	41304	476	45.31	57	0.213941	0.786059	692.56	0.229695	0.770305	484.787	3.64679	16.3532	2.82233	17.1777	26	41394	145	41394	355	41394	274	41394	6.45	41394	180	60	41010	0.409524	5	4.30062	41263	0.0205168	0.027881	0.025527	0.0123517
B135	1	321	F	1	ZL	41326	425	43.1	44	0.231011	0.768989	706.517	0.166498	0.833502	588.937	5.45719	14.5428	3.73844	16.2616	18	41394	17	41394	176	41394	463	41394	4.93	41394	84	30	41010	0.65042	6	6.29907	41263	0.0236388	0.00830614	0.00792977	0.00470963
B136	0	379	F	1	ASTA	41310	435	48.81	53	0.216613	0.783387	555.693	0.130288	0.869712	459.927	4.77397	15.226	3.41724	16.5828	25	41394	133	41394	334	41394	368	41394	5.11	41394	148	49	41010	0.4125	5	6.71299	41263	0.0253268	0.0365597	0.0324297	0.0133937
B137	1	369	F	1	ASTA	41311	415	43.92	43	0.185413	0.814587	662.443	0.243273	0.756727	781.107	5.38876	14.6112	3.69089	16.3091	22	41390	68	41390	169	41390	244	41390	9.46	41390	120	44	41010	0.516667	14	5.0199	41262	0.0145413	0.0376208	0.0270113	0.0129755
B139	0	383	M	1	ZL	41309	467	46.27	47	0.182936	0.817064	790.767	0.105695	0.894305	388.293	3.6602	16.3398	3.68323	16.3168	22	41394	66	41394	234	41394	175	41394	6.94	41394	136	48	41010	0.391444	8	4.77893	41263	0.0250552	0.0261531	0.0244691	0.0102851
B141	0	385	M	1	ASTA	41305	450	48.07	50	0.172064	0.827936	338.517	0.143276	0.856724	470.167	4.38567	15.6143	3.8137	16.1863	20	41394	118	41394	226	41394	494	41394	8.25	41394	148	47	41010			4.84779	41263	0.021006	0.0265065	0.027857	0.0137199
B142	0	385	F	1	ASTA	41310	410	44.72	48	0.167963	0.832037	663.41	0.199537	0.800463	576.037	6.82737	13.1726	3.93824	16.0618	23	41394	77	41394	217	41394	254	41394	5.32	41394	154	51	41010			4.43364	41263	0.0223791	0.0130859	0.0176998	0.00809161
B143	0	379	M	1	ASTA	41311	499	46.7	56	0.198428	0.801572	726.42	0.165777	0.834223	539.723	2.54551	17.4545	3.90542	16.0946	20	41394	83	41394	280	41394	136	41394	4.22	41394	146	49	41010	0.404795	5	3.24428	41263	0.0305078	0.0374743	0.0288086	0.0129232
B146	0	376	M	1	LZ	41310	479	46.83	60	0.178459	0.821541	626.823	0.12221	0.87779	436.297	2.84443	17.1556	3.56539	16.4346	23	41394	42	41394	231	41394	171	41394	8.81	41394	125	78.5	41010	0.644118	5	6.5574	41263	0.0202762	0.0174425	0.025059	0.0109081
B147	0	376	F	1	LZ	41311	407	42.99	53	0.161674	0.838326	654.217	0.130459	0.869541	446.88	5.53536	14.4646	3.93193	16.0681	21	41394	18	41394	136	41394	157	41394	6.86	41394	124	30.5	41010	0.437675	5	3.37437	41263	0.0236436	0.0214746	0.0262585	0.0126566
B148	0	377	M	1	control	41324	422	45.15	48	0.180296	0.819704	551.477	0.155086	0.844914	434.01	4.25373	15.7463	3.41995	16.5801	21	41390	35	41390	212	41390	390	41390	8.89	41390	166	45	41011	0.611236	15	3.58313	41262	0.0247127	0.0152946	0.0213388	0.00985759
B149	0	374	M	1	ASTA	41324	401	47.05	55	0.148822	0.851178	657.76	0.149776	0.850224	588.053	4.98681	15.0132	3.87901	16.121	19	41393	32	41393	204	41393	210	41393	5.44	41393	128	44	41010	0.457143	14	6.30962	41262	0.0225657	0.0230394	0.0281616	0.0131097
B150	0	374	F	1	ASTA	41310	354	43.1	48	0.149716	0.850284	701.783	0.140799	0.859201	503.033	5.25022	14.7498	3.89994	16.1001	20	41394	69	41394	214	41394	224	41394	5.94	41394	144	56	41010			6.8634	41263	0.0234052	0.0222135	0.0248724	0.0117427
B151	0	373	M	1	ASTA	41309	460	45.54	49	0.203491	0.796509	669.18	0.267705	0.732295	521.767	3.92084	16.0792	3.79633	16.2037	19	41396	112	41396	316	41396	151	41396	4.91	41396	174	59	41010	0.367184	9	2.08616	41263	0.0230096	0.0266789	0.0229366	0.0119032
B152	0	373	F	1	ASTA	41304	411	43.05	45	0.176857	0.823143	706.747	0.149891	0.850109	533.003	5.83094	14.1691	3.53041	16.4696	21	41394	64	41394	187	41394	105	41394	5.25	41394	120	49	41010	0.671146	6	3.52796	41263	0.0219066	0.0295641	0.0267285	0.0114123
B153	0	372	M	1	control	41311	431	44.82	54	0.188588	0.811412	750.817	0.192528	0.807472	584.673	4.3191	15.6809	3.56546	16.4345	19	41390	52	41390	214	41390	333	41390	6.72	41390	158	49	41010	0.587342	14	5.96153	41262	0.020704	0.0205278	0.0184626	0.00815098
B154	0	371	M	1	LZ	41326	425	45.57	51	0.220579	0.779421	706.577	0.182057	0.817943	425.497	7.75172	12.2483	3.89176	16.1082	19	41394	65	41394	219	41394	90	41394	2.98	41394	124	77	41010	0.383831	5	4.35241	41263	0.0231896	0.0179657	0.0141227	0.0073781
B155	0	370	M	1	ZL	41316	391	45.35	54	0.182763	0.817237	708.65	0.202848	0.797152	659.103	4.21621	15.7838	3.95887	16.0411	21	41390	134	41390	291	41390	119	41390	5.64	41390	132	56	41010	0.389809	9	1.54404	41260	0.0267488	0.0274281	0.0262862	0.0116399
B156	1	369	M	1	ASTA	41324	444	44.84	53	0.240671	0.759329	569.547	0.133558	0.866442	484.467	6.14608	13.8539	3.66926	16.3307	19	41393	50	41393	220	41393	183	41393	7.82	41393	142	48	41010	0.812042	17	3.76529	41262	0.0275386	0.0201388	0.0203559	0.0102796
B158	1	367	M	1	control	41309	450	45.13	55	0.172529	0.827471	687.787	0.136694	0.863306	434.667	4.95637	15.0436	3.60689	16.3931	24	41394	50	41394	288	41394	139	41394	7.37	41394	118	48	41011	0.436576	6	3.55667	41263	0.0249072	0.0209379	0.0310908	0.0145233
B159	0	365	M	1	control	41311	469	49.09	51	0.192663	0.807337	676.55	0.171475	0.828525	613.043	4.57255	15.4274	3.7293	16.2707	22	41394	124	41394	254	41394	285	41394	7.17	41394	120	66	41011	0.401431	6	3.4874	41263	0.0282939	0.0246646	0.0304116	0.012139
B160	0	364	M	1	ZL	41304	433	46.99	53	0.193902	0.806098	722.04	0.255325	0.744675	624.02	7.30564	12.6944	3.78978	16.2102	21	41394	102	41394	244	41394	314	41394	5.68	41394	156	42	41011	0.345098	5	2.97131	41263	0.0254396	0.0241368	0.0242328	0.0113454
B161	0	362	M	1	control	41304	407	46.18	55	0.19685	0.80315	652.29	0.16753	0.83247	550.673	7.05441	12.9456	3.73029	16.2697	22	41394	73	41394	256	41394	199	41394	7.46	41394	150	49	41011			5.03048	41263	0.0224673	0.0187938	0.0281882	0.0128033
B162	0	361	M	1	control	41324	443	46.64	46	0.22032	0.77968	801.733	0.162911	0.837089	513.527	5.86536	14.1346	4.01009	15.9899	18	41393	61	41393	207	41393	163	41393	4.35	41393	80	51	41011			3.5985	41262	0.0217962	0.0200992	0.020123	0.00928375
B163	0	360	M	1	LZ	41310	424	46.11	53	0.278095	0.721905	753.77	0.198208	0.801792	508.207	8.27681	11.7232	4.04903	15.951	20	41394	58	41394	211	41394	130	41394	4.51	41394	152	55	41011	0.286567	9	3.8598	41263	0.0222003	0.0111569	0.0117831	0.00613383
B164	0	359	F	1	ZL	41311	388	41.58	52	0.170846	0.829154	444.76	0.119245	0.880755	449.247	5.00665	14.9934	3.49047	16.5095	20	41394	34	41394	164	41394	160	41394	4.35	41394	176	62	41011	0.309677	6	4.0527	41263	0.0205039	0.0212054	0.0274999	0.0121265
B165	0	358	M	1	ASTA	41305	463	46.65	55	0.183016	0.816984	680.107	0.160378	0.839622	443.677	5.76942	14.2306	3.89293	16.1071	20	41394	37	41394	205	41394	147	41394	5.88	41394	172	56	41011	0.593464	5	6.51855	41263	0.0215861	0.0153105	0.018485	0.00961088
B167	0	356	M	1	control	41305	440	47.27	53	0.212017	0.787983	740.043	0.167494	0.832506	465.49	8.42346	11.5765	4.07818	15.9218	22	41394	71	41394	227	41394	217	41394	5.04	41394	122	45	41011	0.377778	6	5.03226	41263	0.0235487	0.0169758	0.0223321	0.00958172
A365	0	261	F	2	control	41313	401	42.63	44	0.296573	0.703427	677.653	0.259864	0.740136	490.193	10.2056	9.7944	4.95507	15.0449	19	41390	43	41390	149	41390	152	41390	7.2	41390	74	72	41059	0.638251	9	4.48077	41260	0.0255216	0.00781842	0.0103231	0.008054
A369	0	366	M	2	LZ	41313	410	44.7	39	0.232807	0.767193	797.69	0.129763	0.870237	435.86	7.15526	12.8447	4.5328	15.4672	17	41390	91	41390	210	41390	188	41390	5.39	41390	92	74	41058	0.409249	9	6.20995	41260	0.0236505	0.013099	0.0197287	0.0167034
A370	2	382	M	2	LZ	41313	411	43.67	47	0.23236	0.76764	613.497	0.144864	0.855136	563.41	9.80933	10.1907	4.70319	15.2968	13	41390	65	41390	145	41390	90	41390	7.97	41390	94	55	41059	0.796721	8	2.83788	41260	0.0176242	0.0115215	0.0161724	0.0129799
A371	0	279	F	2	ASTA	41313	400	42.86	55	0.326994	0.673006	829.07	0.19411	0.80589	495.98	7.81561	12.1844	4.75933	15.2407	19	41390	25	41390	180	41390	116	41390	8.65	41390	122	62	41059	0.86776	9	6.82332	41260	0.0293299	0.0115164	0.00639071	0.00620452
A376	0	360	F	2	LZ	41313	365	39.78	40	0.211003	0.788997	464.587	0.191362	0.808638	460.703	11.0935	8.90652	4.71901	15.281	21	41390	80	41390	174	41390	106	41390	5.98	41390	64	69	41059	0.501639	8	2.93892	41260	0.0246256	0.0113036	0.0144112	0.0119752
A377	7	354	M	2	ZL	41313	403	45.25	42	0.279432	0.720568	503.967	0.285438	0.714562	415.853	11.2706	8.72937	4.83379	15.1662	18	41390	62	41390	218	41390	533	41390	5.74	41390	166	45	41058	0.409249	8	6.57755	41260	0.0260618	0.0155319	0.00959389	0.0174504
A380	7	354	F	2	ZL	41313	435	44.35	50	0.275977	0.724023	552.143	0.130501	0.869499	407.153	8.09266	11.9073	4.65174	15.3483	18	41390	104	41390	252	41390	161	41390	11.13	41390	60	86	41058	0.826994	9	2.32277	41260	0.0262895	0.0107245	0.0136608	0.0253176
A381	6	371	F	2	LZ	41313	383	43.07	46	0.25388	0.74612	740.877	0.253326	0.746674	609.31	12.0233	7.97673	4.82973	15.1703	17	41390	19	41390	136	41390	357	41390	5.76	41390	60	71	41059	0.434356	9	4.02015	41260	0.0212621	0.00424205	0.00720343	0.00507781
A388	6	356	F	2	control	41313	354	38.34	46	0.25625	0.74375	593.917	0.29599	0.70401	638.92	9.7406	10.2594	4.88345	15.1165	16	41390	19	41390	108	41390	543	41390	5.13	41390	126	35	41059	0.682949	8	7.7452	41260	0.0167933	0.0031372	0.0052157	0.00374754
A397	0	259	M	2	ASTA		410	41.47	43	0.292378	0.707622	539.867	0.244687	0.755313	543.21	9.99511	10.0049	5.02821	14.9718											126	59	41059
A398	0	364	F	2	ZL	41313	403	41.37	49	0.199499	0.800501	588.487	0.15993	0.84007	456.24	7.66014	12.3399	4.54784	15.4522	14	41390	72	41390	200	41390	221	41390	4.98	41390	138	57	41058	0.277596	9	2.00642	41260	0.0236506	0.0131513	0.0169925	0.0340785
A399	0	256	F	2	control	41313	319	38.56	43	0.230974	0.769026	675.143	0.186609	0.813391	492.593	8.08108	11.9189	4.68219	15.3178	19	41396	34	41396	171	41396	204	41396	6.35	41396	68	61	41058	0.672581	8	3.05635	41260	0.0264254	0.0141532	0.012755	0.00866352
A400	3	362	F	2	control	41323	364	42.98	37	0.244759	0.755241	657.557	0.190852	0.809148	512.377	10.8163	9.18374	4.47234	15.5277	13	41388	46	41388	117	41388	572	41388	2.91	41388				0.306334	1	7.19933	41260	0.0224746	0.00650318	0.00740279	0.00555341
A423	0	316	M	2	ZL	41316	441	49.38	46	0.260238	0.739762	599.153	0.209976	0.790024	464.38	9.12262	10.8774	4.92037	15.0796	18	41390	44	41390	141	41390	100	41390	5.56	41390	78	61	41059	0.420276	10	3.67986	41260	0.0200614	0.00510292	0.00688263	0.0124545
A427	10	320	F	2	LZ	41316	384	45.64	44	0.26173	0.73827	771.09	0.198695	0.801305	491.793	10.704	9.296	4.36106	15.6389	20	41390	13	41390	104	41390	471	41390	5.56	41390				0.453503	9	3.70409	41260	0.0208709	0.00224217	0.00610059	0.00440557
A428	7	380	M	2	ZL	41323	419	46.9	52	0.191939	0.808061	706.05	0.199209	0.800791	478.397	8.80388	11.1961	5.10953	14.8905	20	41394	82	41394	188	41394	158	41394	14.84	41394	94	71	41059	0.726949	2	2.79072	41260	0.0232274	0.0113675	0.010814	0.0206271
A429	2	309	M	2	control	41323	386	46.98	49	0.287001	0.712999	836.277	0.223416	0.776584	386.773	10.1446	9.8554	4.87363	15.1264	12	41388	37	41388	139	41388	109	41388	5.81	41388	152	53	41058	0.50982	1	4.47314	41260	0.0220698	0.0082214	0.0107952	0.0078619
A432	0	283	M	2	control	41320	475	47.82	54	0.266292	0.733708	640.683	0.1991	0.8009	453.653	10.2643	9.73573	4.68801	15.312	18	41389	66	41389	190	41389	96	41389	5.95	41389	110	57	41059	0.450277	11	2.03804	41260	0.0200932	0.00943622	0.0144201	0.0100173
A433	0	322	F	2	ASTA	41320	474	42.34	42	0.25803	0.74197	690.103	0.107571	0.892429	420.987	9.07359	10.9264	4.3168	15.6832	21	41390	50	41390	272	41390	243	41390	9.51	41390	152	50	41058	0.849538	11	5.28989	41260	0.0279908	0.00985457	0.00704835	0.00704249
A437	2	309	F	2	control	41313	488	42.47	44	0.267792	0.732208	693.46				14.4743	5.52574	4.82301	15.177	22	41390	36	41390	202	41390	331	41390	6.16	41390	60	60	41058	1.01953	3	7.0771	41260	0.0251804	0.00276219	0.00519566	0.00384574
A439	10	320	M	2	LZ	41316	454	46.42	51	0.228733	0.771267	474.467	0.205622	0.794378	381.97	9.53925	10.4608	4.81134	15.1887	18	41390	35	41390	163	41390	162	41390	13.35	41390	124	49	41058			4.02708	41260	0.0246849	0.00706008	0.0139151	0.0125625
A445	0	307	F	2	ASTA	41320	399	42.31	41	0.00346985	0.99653	532.167	-0.0719029	1.0719	431.203	11.5284	8.47157	5.00843	14.9916	18	41389	41	41389	155	41389	125	41389	6.57	41389	130	49	41059	0.61833	12	3.75577	41260	0.0215915	0.00880206	0.00635718	0.00637688
A449	0	291	F	2	ASTA	41323	423	44.81	41	0.323088	0.676912	739.033	0.244984	0.755016	455.313	11.0873	8.91274	4.897	15.103	20	41393	68	41393	176	41393	209	41393	11.87	41393	70	73	41058	0.706029	1	2.49047	41260	0.0295017	0.00846934	0.00579207	0.00543725
A450	0	322	M	2	ASTA	41313	351	49.47	44	0.189367	0.810633	720.813	0.192048	0.807952	347.207	8.46582	11.5342	3.80058	16.1994	19	41390	74	41390	282	41390	282	41390	6.4	41390	134	47	41058			3.90112	41260	0.0270002	0.0143792	0.00767335	0.0078952
A451	0	317	F	2	ASTA	41323	427	45.97	40	0.284476	0.715524	699.623	0.202552	0.797448	481.413	15.0804	4.9196	5.08098	14.919	12	41388	34	41388	120	41388	124	41388	11.97	41388	136	52	41059			3.33731	41260	0.0231161	0.0097824	0.00578408	0.005057
A453	2	363	F	2	ASTA	41323	404	46.02	40	0.237904	0.762096	839.753	0.175625	0.824375	424.67	11.4264	8.57358	5.3681	14.6319											62	82	41058	0.343215	2			0.0320806	0.0146068	0.00773452	0.00824284
A455	0	304	F	2	control	41323	410	47.26		0.283597	0.716403	364.17	0.232377	0.767623	503.387	11.4729	8.52713	4.9637	15.0363	15	41388	79	41388	168	41388	111	41388	3.06	41388	78	90	41059	0.319335	2	3.65103	41260	0.0244915	0.00720663	0.00881413	0.00645375
A458	7	380	F	2	ZL	41323	365	43.25	43	0.262972	0.737028	796.773	0.146165	0.853835	373.637	8.72522	11.2748	4.53891	15.4611	15	41388	26	41388	121	41388	522	41388	4.71	41388				0.382443	2	6.64293	41260	0.0248554	0.00542739	0.00609525	0.00726416
A459	2	363	M	2	ASTA	41316	437	48.73	43	0.209281	0.790719	608.9	0.148242	0.851758	509.237	9.00834	10.9917	4.60761	15.3924	19	41390	32	41390	156	41390	140	41390	10.62	41390	144	46	41058			3.70947	41260	0.0250384	0.00983343	0.00780584	0.00838999
A480	0	294	M	2	control		381	43.82		0.258238	0.741762	550.26	0.22057	0.77943	546.313	10.9464	9.05364	5.16584	14.8342
A482	2	382	F	2	LZ	41323	474	43.34	42	0.191783	0.808217	797.153	0.16756	0.83244	582.487	8.95371	11.0463	4.75737	15.2426	13	41388	35	41388	187	41388	515	41388	6.86	41388	64	58	41058	0.593988	1	7.75893	41260	0.0179416	0.00693897	0.00863199	0.00627108
A483	14	278	M	2	ZL	41323	384	43.31	38	0.221924	0.778076	379.09	0.148912	0.851088	443.793	7.28577	12.7142	4.6208	15.3792	13	41388	42	41388	178	41388	88	41388	7.77	41388	102	58	41059	0.547137	1		41260	0.0240574	0.0109521	0.0154982	0.0265293
A484	1	375	M	2	ZL	41316	471	47.61	48	0.159143	0.840857	269.31	0.124551	0.875449	459.22	7.93664	12.0634	4.75863	15.2414	22	41390	64	41390	221	41390	167	41390	8.81	41390	130	57	41059	0.653708	8	5.41496	41260	0.0309956	0.0118016	0.0134318	0.0333915
A485	0	270	F	2	control	41316	323	38.83	45	0.250376	0.749624	713.417	0.217502	0.782498	482.29	10.9881	9.01185	4.69903	15.301	17	41390	57	41390	170	41390	123	41390	5.3	41390	62	81	41059	0.395549	11	3.22576	41260	0.0204455	0.0062012	0.00935294	0.00681325
A490	3	355	M	2	LZ	41323	434	47.09	47	0.197761	0.802239	335.4	0.240649	0.759351	213.53	9.40238	10.5976	4.96122	15.0388	22	41393	53	41393	236	41393	252	41393	9.32	41393	72	87	41058	0.392873	2	3.35162	41260	0.0219092	0.00999616	0.0212258	0.0176109
A491	4	257	M	2	LZ	41323	430	46.23	43	0.16064	0.83936	757.01	0.155338	0.844662	496.363	6.76202	13.238	4.69065	15.3094	12	41388	32	41388	138	41388	229	41388	12.64	41388	120	45	41058			5.6722	41260	0.027496	0.00742059	0.0167394	0.0135641
A493	1	359	M	2	ZL	41320	422	44.39	52	0.185468	0.814532	504.947	0.217888	0.782112	447.88	9.17421	10.8258	4.6908	15.3092	20	41393	27	41393	168	41393	152	41393	8.08	41393	170	53	41059	0.430898	2	3.10158	41263	0.0203568	0.00879255	0.0132549	0.025989
A494	3	265	F	2	ZL	41316	417	42.07	45	0.201132	0.798868	648.373	0.201587	0.798413	539.323	8.12876	11.8712	4.83023	15.1698	21	41390	33	41390	129	41390	658	41390	6.86	41390				1.17545	8	8.75464	41260	0.0294179	0.00632135	0.00633669	0.00794071
A535	0	361	F	2	control	41324	319	39.19	41	0.237359	0.762641	599.137	0.145458	0.854542	501.187	6.87605	13.124	4.94086	15.0591	18	41388	70	41388	167	41388	158	41388	7.11	41388	88	53	41059	0.507363	2	3.95308	41263	0.0194729	0.0119571	0.0122992	0.0085155
A568	14	358	F	2	ASTA	41320	412	42.6	34	0.28415	0.71585	614.227	0.309653	0.690347	650.193	11.1201	8.8799	5.15771	14.8423	19	41388	13	41388	106	41388	413	41388	14.48	41388	62	66	41059			2.43225	41260	0.0232498	0.003591	0.00489898	0.00387692
A571	0	388	F	2	ASTA		386	45.52	29	0.256088	0.743912	678.907	0.214872	0.785128	584.077	11.8187	8.18134	4.26633	15.7337	14	41393	44	41393	133	41393	139	41393	5.04	41393	120	50	41058	0.404249	5	2.49143	41256
A578	0	365	F	2	control	41320	445	43.16	47	0.226935	0.773065	558.82	0.128219	0.871781	394.073	9.2886	10.7114	4.87924	15.1208	21	41390	72	41390	145	41390	427	41390	12.06	41390	158	69	41058	0.415308	11	2.55621	41260	0.0168922	0.014372	0.00918505	0.00676009
A716	0	256	M	2	control		512	47.89		0.238274	0.761726	655.997	0.193152	0.806848	485.67	6.97738	13.0226	4.49794	15.5021
A717	1	267	M	2	LZ	41312	478	45.81	50	0.221005	0.778995	780.267	0.156006	0.843994	481.583	6.67044	13.3296	4.93224	15.0678	18	41388	44	41388	200	41388	211	41388	7.62	41388	116	45	41058	0.763895	2	3.87561	41262	0.0226151	0.0151567	0.0277361	0.0217725
A718	4	257	F	2	LZ	41318	421	43.51	45	0.246073	0.753927	642.127	0.204316	0.795684	531.79	7.83881	12.1612	4.58897	15.411	17	41388	74	41388	194	41388	664	41388	6.97	41388	116	39	41058	0.571098	20	6.81075	41261	0.0324381	0.0145554	0.015229	0.0110169
A719	2	258	M	2	ZL	41324	447	46.45	47	0.199937	0.800063	669.063	0.179513	0.820487	462.54	7.35473	12.6453	4.78249	15.2175	17	41388	81	41388	214	41388	272	41388	11.01	41388	64	89	41059	0.857618	4	4.82911	41263	0.0261198	0.0128526	0.0162436	0.0300668
A720	2	258	F	2	ZL	41317	403	43.87	54	0.19152	0.80848	547.497	0.168008	0.831992	461.467	8.13266	11.8673	4.6193	15.3807	18	41388	80	41388	206	41388	241	41388	11.63	41388	72	55	41059	0.626738	17	5.85661	41261	0.030539	0.0255271	0.0230007	0.0448206
A721	0	259	F	2	ASTA	41317	375	41.42	41	0.254593	0.745407	641.48	0.188277	0.811723	500.61	10.4704	9.52956	4.46477	15.5352	17	41388	32	41388	147	41388	116	41388	12.63	41388	118	50	41059	1.32299	4	4.0868	41263	0.0259433	0.00830874	0.0101077	0.00750405
A724	0	261	M	2	control	41309	449	45.58	39	0.249838	0.750162	658.257	0.200838	0.799162	510.583	7.86083	12.1392	4.9334	15.0666	14	41388	30	41388	125	41388	131	41388	8.32	41388	112	79	41059	0.708434	18	2.68277	41261	0.0161711	0.00875338	0.0101292	0.0069159
A725	0	262	M	2	LZ	41318	426	41.85	53	0.286798	0.713202	808.677	0.227128	0.772872	464.517	9.34002	10.66	4.73903	15.261	22	41388	47	41388	247	41388	268	41388	6.95	41388	60	88	41058	0.401262	17	3.93501	41261	0.0338628	0.0127474	0.0231667	0.0202987
A726	0	262	F	2	LZ		311	40.11	40	0.254897	0.745103	770.437	0.236181	0.763819	510.243	8.74489	11.2551	4.6789	15.3211	20	41388	47	41388	207	41388	185	41388	17.46	41388	110	41	41058	1.05706	4	6.40017	41263
A727	4	263	M	2	ZL	41305	468	46.78	43	0.210311	0.789689	661.263	0.181502	0.818498	388.463	7.92249	12.0775	4.57561	15.4244	19	41390	62	41390	192	41390	279	41390	10.69	41390	62	94	41058	0.405604	12	6.6926	41261	0.0205947	0.00883471	0.0142773	0.0228888
A728	4	263	F	2	ZL	41306	431	44.63	47	0.244095	0.755905	510.69	0.219413	0.780587	457.127	7.1466	12.8534	4.58006	15.4199	24	41390	134	41390	321	41390	386	41390	12.49	41390	78	84	41058	0.63437	18	2.42544	41261	0.0216553	0.0176581	0.0171109	0.0334926
A729	11	383	F	2	ZL	41317	402	43.26	39	0.208051	0.791949	702.66	0.218497	0.781503	390.707	8.74185	11.2581	5.05831	14.9417	16	41393	44	41393	181	41393	933	41393	14.21	41393						7.5599	41261	0.0233558	0.0068802	0.00683865	0.010029
A731	3	265	M	2	ZL	41305	446	46.39	54	0.204555	0.795445	710.637	0.147112	0.852888	539.997	7.77095	12.2291	4.85869	15.1413	20	41389	64	41389	231	41389	152	41389	8.81	41389	70	67	41058	0.53279	12	4.65613	41261	0.0181614	0.0120523	0.0210865	0.0403334
A732	11	266	M	2	control	41312	402	43.16	50	0.215226	0.784774	634.187	0.172268	0.827732	395.54	7.77716	12.2228	4.68445	15.3156	22	41389	73	41389	219	41389	188	41389	4.22	41389	100	44	41058	0.364045	11	3.17754	41262	0.0248	0.013384	0.013511	0.0101041
A733	0	381	F	2	LZ	41317	366	40.31	47	0.202607	0.797393	678.57	0.267164	0.732836	512.147	11.4521	8.54789	4.85039	15.1496	17	41388	158	41388	277	41388	872	41388	8.53	41388	68	56	41059	0.550119	2	2.7153	41261	0.0264819	0.0162798	0.0214205	0.0158956
A734	1	267	F	2	LZ	41306	382	43.19	46	0.216762	0.783238	763.8	0.168509	0.831491	435.583	7.56542	12.4346	4.48672	15.5133	20	41389	84	41389	192	41389	233	41389	7.58	41389	100	49	41058	0.560452	12	3.94699	41262	0.027297	0.00945301	0.0177918	0.0142349
A735	11	266	F	2	control	41320	386	44.15	55	0.266783	0.733217	684.723	0.326556	0.673444	649.673	8.64192	11.3581	4.69601	15.304	21	41388	35	41388	181	41388	662	41388	5.79	41388	134	40	41058	0.368362	2	10.5328	41260	0.0199455	0.00502057	0.00584472	0.0040994
A736	6	268	F	2	ZL	41316	387	42.43	49	0.272203	0.727797	601.967	0.229123	0.770877	493.56	8.92737	11.0726	4.74724	15.2528	18	41393	125	41393	329	41393	1487	41393	8.63	41393	64	58	41058	0.619108	7	5.62303	41256	0.0209815	0.0180705	0.0108848	0.0179548
A737	6	268	M	2	ZL	41312	400	47	46	0.206578	0.793422	576.33	0.175676	0.824324	502.7	8.65105	11.349	5.20416	14.7958	21	41389	60	41389	204	41389	148	41389	7.11	41389	72	77	41058	0.442105	14	4.96949	41262	0.0204964	0.00670059	0.00887202	0.0185902
A738	5	269	F	2	ASTA	41317	390	42.12	48	0.29345	0.70655	522.2	0.200657	0.799343	469.34	9.7186	10.2814	4.4424	15.5576	17	41388	43	41388	163	41388	168	41388	10.57	41388	74	76	41059	0.761157	3	0.810445	41261	0.0252073	0.0126185	0.00695873	0.0076122
A739	5	269	M	2	ASTA	41306	416	45.13	50	0.290707	0.709293	441.633	0.224941	0.775059	562.783	6.99292	13.0071	4.63901	15.361	21	41389	32	41389	168	41389	111	41389	5.66	41389	112	67	41058	0.4157	11	3.15402	41262	0.0223684	0.00846689	0.00591416	0.00521211
A740	0	272	M	2	LZ	41320	471	49.79	46	0.227328	0.772672	779.677	0.177896	0.822104	555.39	6.92143	13.0786	4.76608	15.2339	18	41394	70	41394	178	41394	128	41394	10.12	41394	120	47	41059	0.688435	1	2.12394	41260	0.0237622	0.00893669	0.0167179	0.0139126
A741	1	272	F	2	LZ	41318	356	46.65	65	0.249574	0.750426	542.247	0.198488	0.801512	560.947	8.29391	11.7061	4.62052	15.3795	21	41388	88	41388	237	41388	257	41388	17.45	41388	70	79	41059			1.40358	41261	0.0250662	0.0192216	0.0177663	0.0161194
A743	3	274	F	2	ASTA	41317	410	44.29	47	0.28541	0.71459	909.02	0.231914	0.768086	444.93	8.70826	11.2917	4.74567	15.2543	17	41393	62	41393	169	41393	130	41393	5.3	41393	126	61	41059	0.306231	18	3.94314	41261	0.020841	0.00727557	0.00673466	0.00682855
A744	3	274	M	2	ASTA	41320	420	43.4	49	0.231619	0.768381	621.11	0.225571	0.774429	541.293	7.5969	12.4031	4.54492	15.4551	23	41388	37	41388	187	41388	124	41388	6.74	41388	114	51	41059	0.350462	1	2.49847	41260	0.0259891	0.00982939	0.0061161	0.00598633
A745	1	275	M	2	LZ	41317	416	49.05	45	0.181814	0.818186	545.83	0.164045	0.835955	414.95	7.27447	12.7255	4.78561	15.2144	21	41393	86	41393	227	41393	120	41393	13.5	41393	120	49	41059	0.706825	18	5.19714	41261	0.0302776	0.0141471	0.0255683	0.0210293
A746	1	275	F	2	LZ	41312	406	44.07	37	0.2305	0.7695	706.907	0.19165	0.80835	474.973	9.57207	10.4279	4.81286	15.1871	19	41389	33	41389	175	41389	133	41389	8.2	41389	116	48	41059	0.485932	14	2.7922	41262	0.0325059	0.0135694	0.00651789	0.00664097
A747	2	288	M	2	control	41312	440	47.49	50	0.264232	0.735768	638.417	0.214634	0.785366	578.987	9.39686	10.6031	4.60458	15.3954	22	41389	56	41389	193	41389	147	41389	6.43	41389	132	74	41058	0.556159	12	6.43982	41262	0.0233023	0.0088237	0.0136143	0.00977701
A748	1	271	F	2	ASTA	41312	393	44.48	47	0.285143	0.714857	785.77	0.229236	0.770764	543.087	9.93844	10.0616	4.79481	15.2052	22	41389	79	41389	222	41389	157	41389	8.1	41389	70	72	41059	0.373286	15	3.7412	41262	0.0263465	0.0130876	0.00649977	0.00690897
A749	0	270	M	2	control	41306	450	46.63	47	0.278206	0.721794	823.74	0.175526	0.824474	509.217	7.33184	12.6682	4.62844	15.3716	18	41388	68	41388	216	41388	141	41388	6.09	41388	142	50	41059	0.408511	19	3.47919	41261	0.0211647	0.0100296	0.0126513	0.00890863
A750	14	278	F	2	ZL	41309	355	42.8	43	0.253251	0.746749	593.017	0.21626	0.78374	430.323	8.23155	11.7685	4.74778	15.2522	17	41388	51	41388	236	41388	423	41388	6.18	41388	130	42	41059	0.404674	17	4.39018	41261	0.015691	0.00701087	0.00678259	0.00924548
A751	0	279	M	2	ASTA	41317	381	41.43	48	0.321943	0.678057	573.667	0.243129	0.756871	517.737	10.5732	9.42681	4.67986	15.3201	22	41393	90	41393	236	41393	146	41393	6.85	41393	74	55	41059	0.616043	17	3.40481	41261	0.0231629	0.0153926	0.00696824	0.0072879
A753	0	298	F	2	ASTA	41305	454	43.61	49	0.226369	0.773631	362.223	0.181951	0.818049	432.48	8.59848	11.4015	4.88372	15.1163	21	41390	34	41390	115	41390	787	41390	5.74	41390	70	55	41059	0.947107	13	8.76045	41261	0.0190029	0.00639422	0.00560511	0.00552842
A754	0	283	F	2	control	41305	369	43.64	42	0.237517	0.762483	736.893	0.195698	0.804302	504.693	9.6805	10.3195	4.67101	15.329	21	41390	46	41390	193	41390	136	41390	6.35	41390	98	67	41059	0.559596	12	5.42945	41261	0.0168648	0.014835	0.0130192	0.0087283
A755	7	284	M	2	LZ	41309	453	48.05	60	0.267382	0.732618	882.227	0.201162	0.798838	483.26	8.47155	11.5284	4.60167	15.3983	21	41388	39	41388	214	41388	165	41388	5.74	41388	158	65	41059	0.374624	17	4.95817	41261	0.0212975	0.0101576	0.0137459	0.0119386
A756	7	284	F	2	LZ	41318	381	44.56	46	0.291774	0.708226	767.123	0.22079	0.77921	516.44	9.60029	10.3997	4.71923	15.2808	14	41388	58	41388	148	41388	116	41388	5.76	41388	134	65	41059	0.383133	18	3.17114	41261	0.0187326	0.00877339	0.0111275	0.0094454
A757	8	273	M	2	ZL	41317	453	48.81	51	0.194123	0.805877	676.927	0.214054	0.785946	610.22	7.37561	12.6244	4.69837	15.3016	20	41393	104	41393	274	41393	199	41393	9.87	41393	126	49	41059	0.502743	4	2.74546	41261	0.0246765	0.0148597	0.0132296	0.0301076
A758	6	286	M	2	ASTA	41312	412	46.08	50	0.241143	0.758857	702.943	0.185773	0.814227	491.897	8.19501	11.805	4.28907	15.7109	22	41389	33	41389	182	41389	111	41389	14.34	41389	126	76	41058	1.24286	16	4.10353	41262	0.0237298	0.00991386	0.00760391	0.00850832
A759	0	287	M	2	ZL	41312	415	45.1	44	0.22345	0.77655	423.23	0.201632	0.798368	615.227	7.38861	12.6114	4.69786	15.3021	22	41389	112	41389	265	41389	246	41389	11.73	41389	86	50	41058	0.668541	15	4.65	41262	0.0326945	0.0151801	0.0128633	0.0275706
A760	0	287	F	2	ZL	41312	381	45.06	46	0.227635	0.772365	650.24	0.192029	0.807971	520.277	8.88869	11.1113	4.71694	15.2831	21	41389	88	41389	226	41389	211	41389	10.09	41389	164	67	41058	0.57479	11	3.34065	41262	0.0224648	0.0224697	0.0173925	0.0355325
A761	3	276	F	2	control		407	44.71	49	0.318877	0.681123	968.047	0.219156	0.780844	502.19	8.89234	11.1077	4.72577	15.2742	17	41393	62	41393	176	41393	344	41393	7.65	41393	60	60	41059
A762	2	288	F	2	control	41311	436	44.19	44	0.282466	0.717534	831.637	0.20696	0.79304	467.877	11.8877	8.11232	4.71967	15.2803	18	41390	71	41390	248	41390	331	41390	7.62	41390	60	60	41058	0.433333	14	5.98628	41262	0.0248127	0.00433185	0.00568665	0.00403593
A763	1	289	F	2	LZ	41309	357	42.25	43	0.197578	0.802422	516.433	0.139723	0.860277	445.773	7.75006	12.2499	4.74953	15.2505	23	41388	64	41388	219	41388	134	41388	9.64	41388	152	65	41058	0.428929	17	3.65593	41261	0.0214217	0.0107236	0.0189402	0.0199497
A764	1	289	M	2	LZ	41320	420	45.15	46	0.212255	0.787745	600.487	0.141027	0.858973	375.783	9.02554	10.9745	4.73756	15.2624	22	41388	78	41388	252	41388	169	41388	8.41	41388	132	43	41058	0.368362	2	2.81305	41260	0.025165	0.0160941	0.0213197	0.0232603
A765	1	290	F	2	ZL	41317	405	45.98	40	0.230825	0.769175	652.337	0.209864	0.790136	469.817	9.02094	10.9791	4.78238	15.2176	17	41393	24	41393	103	41393	80	41393	6.69	41393	76	64	41058	0.497168	18	2.68767	41261	0.0268502	0.00808918	0.0110607	0.0225808
A766	1	290	M	2	ZL	41312	452	47.45	49	0.215986	0.784014	766.083	0.199012	0.800988	557.637	6.52145	13.4786	4.8411	15.1589	20	41389	130	41389	245	41389	188	41389	8.05	41389	132	44	41058	0.643841	12	5.324	41262	0.0317256	0.0160537	0.013794	0.0296101
A770	0	294	F	2	control	41324	406	44.5	42	0.199626	0.800374	693.693	0.179906	0.820094	474.36	8.29609	11.7039	4.72385	15.2761	18	41388	66	41388	182	41388	194	41388	6.08	41388	98	49	41058	0.421853	2	5.01669	41263	0.0268048	0.0144861	0.0131561	0.009242
A771	0	293	F	2	control		407	43.43	50	0.26821	0.73179	624.233	0.21818	0.78182	407.857	14.8374	5.16256	5.02926	14.9707	21	41393	71	41393	181	41393	195	41393	7.5	41393	102	62	41058	0.607299	3	3.39921	41261
A772	0	295	M	2	LZ	41309	487	47.08	45	0.214961	0.785039	410.19	0.161516	0.838484	471.813	6.82994	13.1701	4.75329	15.2467	22	41388	49	41388	266	41388	115	41388	8.82	41388	148	55	41058	0.518675	18	4.71056	41261	0.0220525	0.027845	0.0306616	0.0202753
A773	0	295	F	2	LZ		373	43.34	37	0.213009	0.786991	643.777	0.169121	0.830879	627.073	7.86983	12.1302	5.23028	14.7697	16	41393	24	41393	152	41393	89	41393	7.04	41393	76	52	41058
A774	0	296	M	2	ZL	41306	424	48.31	44	0.199158	0.800842	595.583	0.192787	0.807213	558.503	6.6554	13.3446	4.89005	15.1099	18	41389	51	41389	163	41389	157	41389	8.07	41389	110	63	41059	0.481356	12	3.58225	41262	0.0194243	0.00736403	0.0124963	0.028199
A775	0	296	F	2	ZL	41316	344	41.89	47	0.166384	0.833616	680.737	0.172768	0.827232	657.597	8.61157	11.3884	4.86897	15.131	15	41388	46	41388	154	41388	118	41388	7.07	41388	118	52	41059	0.392169	18	3.10543	41261	0.0245628	0.0113821	0.0108113	0.0239043
A776	1	297	M	2	ASTA	41312	424	47.18	44	0.301853	0.698147	693.613	0.240208	0.759792	533.31	9.61633	10.3837	4.70005	15.3	22	41389	95	41389	232	41389	176	41389	7.32	41389	68	61	41059	0.594455	14	3.98703	41262	0.0243062	0.00738889	0.0124882	0.0107692
A777	1	297	F	2	ASTA	41318	452	44.5	43	0.24999	0.75001	820.317	0.26344	0.73656	349.263	7.55875	12.4413	4.60482	15.3952	18	41388	25	41388	118	41388	487	41388	3.1	41388	62	78	41059	0.373498	18	6.1817	41261	0.021578	0.00615509	0.0051899	0.00428722
A778	0	298	M	2	ASTA	41318	384	48.1	49	0.263774	0.736226	652.137	0.182362	0.817638	535.277	8.10592	11.8941	4.57499	15.425	18	41388	35	41388	152	41388	101	41388	15.65	41388	106	60	41059			5.48169	41261	0.024114	0.0095579	0.00639556	0.00597511
A780	0	306	M	2	ZL	41312	430	46.16	43	0.19403	0.80597	638.537	0.204805	0.795195	624.07	7.45931	12.5407	4.98261	15.0174	16	41388	40	41388	176	41388	81	41388	9.45	41388	80	60	41058	0.792399	2	4.40421	41262	0.0315438	0.0167284	0.0171062	0.0335708
A781	0	306	F	2	ZL	41312	447	45.76	53	0.241607	0.758393	703.49	0.189189	0.810811	499.11	6.67825	13.3217	5.03817	14.9618	23	41389	163	41389	310	41389	405	41389	7.81	41389	60	87	41059			4.14654	41262	0.0289938	0.0176892	0.0140671	0.032903
A782	13	300	M	2	LZ	41311	412	45.7	50	0.203644	0.796356	515.153	0.169425	0.830575	502.59	8.42862	11.5714	4.9259	15.0741	20	41389	27	41389	173	41389	165	41389	6.6	41389	120	57	41059	0.439187	14	4.26786	41262	0.025847	0.0057796	0.0163187	0.0153086
A783	13	300	F	2	LZ	41306	472	44.79	42	0.32847	0.67153	739.02	0.327969	0.672031	507.037	9.96682	10.0332	4.53044	15.4696	20	41389	37	41389	150	41389	712	41389	5.28	41389				0.546955	12	9.52735	41262	0.0169493	0.00462498	0.00650763	0.00496965
A784	12	377	F	2	control	41309	367	42.24	51	0.228817	0.771183	511.227	0.169178	0.830822	399.487	9.12912	10.8709	4.70352	15.2965	21	41388	52	41388	153	41388	954	41388	12.21	41388	142	37	41059			10.0213	41261	0.0160427	0.00854009	0.00628968	0.00443257
A785	0	370	F	2	ZL	41318	367	43.51	49	0.157494	0.842506	361.44	0.13346	0.86654	435.097	9.12175	10.8783	4.51055	15.4894	18	41388	35	41388	130	41388	132	41388	6.63	41388	78	79	41059	0.499329	17	3.63258	41261	0.0230668	0.00932869	0.0123637	0.0219147
A788	0	285	M	2	ZL	41317	455	47.15	38	0.252366	0.747634	551.733	0.202372	0.797628	441.787	6.95018	13.0498	4.50117	15.4988	13	41393	84	41393	218	41393	270	41393	14.11	41393				0.846883	4	2.97495	41261	0.0204973	0.011157	0.0110161	0.0198116
A789	0	285	F	2	ZL	41305	338	40.5	37	0.239658	0.760342	691.83	0.162055	0.837945	312.89	10.6335	9.36646	4.62302	15.377	18	41390	21	41390	98	41390	545	41390	5.36	41390	102	64	41058	0.435275	11	4.35394	41261	0.0171112	0.00839827	0.00979419	0.0144417
A790	12	301	M	2	ZL	41306	370	40.15	42	0.205447	0.794553	701.587	0.194575	0.805425	550.067	7.00912	12.9909	5.10728	14.8927	17	41393	47	41393	157	41393	139	41393	9.54	41393	104	52	41058	0.48707	18	2.88983	41261	0.0162987	0.00790626	0.00813222	0.0162431
A791	12	301	F	2	ZL	41320	493	41.55		0.283406	0.716594	534.073	0.223951	0.776049	449.213	11.014	8.986	4.92012	15.0799	26	41388	197	41388	381	41388	1403	41388	5.82	41388	60	60	41059	0.328281	1	11.8804	41260	0.0287132	0.00771838	0.00762264	0.0123677
A792	9	302	F	2	ASTA	41309	354	40.71	43	0.228851	0.771149	731.43	0.246617	0.753383	454.887	9.30489	10.6951	5.05308	14.9469	19	41388	21	41388	124	41388	471	41388	4.43	41388	122	62	41059	0.352827	18	6.73052	41261	0.0187842	0.00283591	0.00474441	0.00372849
A793	9	302	M	2	ASTA	41306	424	47.72	54	0.297347	0.702653	672.517	0.199238	0.800762	542.187	9.95434	10.0457	4.67168	15.3283	23	41389	68	41389	175	41389	137	41389	10.05	41389	140	56	41059	0.768399	11	2.31757	41262	0.0189325	0.0081382	0.00564423	0.00527268
A794	0	304	M	2	control	41317	378	44.62	49	0.257432	0.742568	742.66	0.189817	0.810183	460.99	8.76455	11.2355	4.84794	15.1521	18	41393	48	41393	182	41393	106	41393	5.55	41393				0.398808	18	2.62457	41261	0.0212341	0.00940851	0.0100681	0.00744686
A795	1	305	F	2	LZ	41317	375	43.82	38	0.277954	0.722046	529.327	0.217714	0.782286	450.667	8.5458	11.4542	4.73045	15.2695	20	41388	33	41388	101	41388	442	41388	6.13	41388	60	78	41059	0.501734	20	9.08841	41261	0.0303425	0.00789811	0.0108533	0.00879886
A796	1	305	M	2	LZ	41318	388	43.67	42	0.238108	0.761892	704.59	0.226102	0.773898	567.01	9.07022	10.9298	4.73449	15.2655	17	41388	21	41388	134	41388	102	41388	6.55	41388	90	71	41059	0.499329	17	2.85971	41261	0.0267139	0.00969788	0.0163563	0.0126858
A797	1	375	F	2	ZL	41312	384	41.6	48	0.227075	0.772925	614.647	0.209439	0.790561	484.087	9.56172	10.4383	4.65548	15.3445	19	41388	60	41388	206	41388	194	41388	9.74	41388	100	56	41059	0.588327	2	3.07584	41262	0.0272466	0.020062	0.017334	0.0329028
A798	0	372	F	2	control	41320	361	41.1		0.174726	0.825274	637.48	0.14444	0.85556	458.3	7.34781	12.6522	4.46937	15.5306	16	41393	110	41393	221	41393	175	41393	6.64	41393	128	56	41059	0.533921	3	3.53388	41261	0.027352	0.0133485	0.011244	0.00782538
A799	6	299	F	2	control	41306	435	44.13	48	0.251186	0.748814	612.387	0.20588	0.79412	549.46	9.91389	10.0861	4.8634	15.1366	19	41389	28	41389	184	41389	620	41389	6.4	41389	116	34	41059	0.546955	12	12.5817	41262	0.0202158	0.00398052	0.006042	0.00437531
A800	6	299	M	2	control	41317	374	43.79	47	0.245824	0.754176	449.673	0.217845	0.782155	577.42					22	41393	69	41393	248	41393	206	41393	4.41	41393	82	77	41059	0.373723	3	3.17083	41261	0.0219219	0.00825857	0.0128998	0.00931174
B102	11	277	M	2	LZ	41311	476	48.14	55	0.216998	0.783002	270.707	0.17255	0.82745	487.043	6.45759	13.5424	4.67308	15.3269	21	41393	29	41393	164	41393	162	41393	7.69	41393	60	61	41059			3.99178	41263	0.0204725	0.0104444	0.0168565	0.013844
B103	0	316	F	2	ZL	41305	371	42.5	48	0.196432	0.803568	609.223	0.204642	0.795358	560.047	8.30703	11.693	5.15637	14.8436	20	41396	55	41396	182	41396	281	41396	8.18	41396	70	55	41059	0.469565	8	4.57072	41263	0.0236222	0.0113598	0.0158738	0.0314297
B104	0	317	M	2	ASTA	41310	345	43.99	49	0.230853	0.769147	724.097	0.202498	0.797502	445.63	8.46525	11.5348	4.43401	15.566	19	41394	45	41394	149	41394	190	41394	12.69	41394	116	44	41059	0.780873	9	4.51687	41263	0.027481	0.010871	0.00768438	0.0077088
B105	0	366	F	2	LZ	41323	371	42.17	38	0.222615	0.777385	559.257	0.181543	0.818457	488.49	9.42861	10.5714	4.80639	15.1936	19	41393	150	41393	226	41393	274	41393	6	41393	122	60	41058	0.469565	15	5.24994	41262	0.023875	0.0115819	0.0164104	0.0158802
B106	0	308	F	2	control	41316	449	42.55	49	0.246378	0.753622	897.967	0.226054	0.773946	436.36	7.14697	12.853	4.26988	15.7301	20	41390	73	41390	182	41390	207	41390	5.4	41390	126	70	41058	0.390123	8	3.61949	41260	0.0214036	0.00609732	0.0104045	0.007751
B107	0	308	M	2	control	41304	345	45.88	42	0.246286	0.753714	626.777	0.187314	0.812686	467.12	11.8587	8.14129	4.88565	15.1143	18	41394	75	41394	161	41394	147	41394	4.97	41394	98	88	41058	0.576744	8	2.94168	41263	0.019767	0.00746417	0.0110365	0.008209
B108	6	314	M	2	control	41311	382	45.67	42	0.234457	0.765543	583.54	0.165895	0.834105	383.27	10.7547	9.24528	4.91224	15.0878	18	41394	56	41394	174	41394	177	41394	3.11	41394	60	83	41058	0.319864	6	3.82726	41263	0.0202718	0.00800246	0.0103326	0.00743208
B109	6	314	F	2	control	41323	424	43.5	38	0.284717	0.715283	431.483	0.241533	0.758467	342.83	11.1771	8.82289	4.99355	15.0065	16	41393	18	41393	140	41393	405	41393	3.1	41393	60	60	41058	0.315415	15	3.93372	41262	0.0217845	0.00317071	0.00540786	0.00389358
B110	0	307	M	2	ASTA	41304	462	46.17	48	0.230526	0.769474	606.353	0.210653	0.789347	311.48	8.35461	11.6454	5.19038	14.8096	16	41396	25	41396	174	41396	72	41396	5.52	41396	60	86	41059	0.358065	8	4.35478	41263	0.0168701	0.00784658	0.00604262	0.00627466
B112	1	318	M	2	LZ	41324	482	44.71	54	0.243351	0.756649	673.247	0.207726	0.792274	513.573	8.09433	11.9057	4.93864	15.0614	22	41393	65	41393	209	41393	223	41393	11.84	41393	122	60	41059			5.7113	41262	0.0307031	0.0116646	0.0223318	0.0177459
B114	3	312	F	2	ASTA	41324	359	43.95	41	0.241237	0.758763	732.237	0.23845	0.76155	447.58	10.0838	9.91622	5.14841	14.8516	17	41393	66	41393	144	41393	544	41393	9.75	41393	134	75	41058	0.750327	15	5.41198	41262	0.019481	0.00695961	0.00531245	0.00472356
B115	3	312	M	2	ASTA	41324	433	45.09	49	0.270001	0.729999	795.43	0.288673	0.711327	486.997	7.49952	12.5005	4.9537	15.0463	16	41393	41	41393	145	41393	174	41393	8.31	41393	72	54	41058	0.789542	15	3.40318	41262	0.0221225	0.0069567	0.00590903	0.00536072
B116	20	315	M	2	LZ	41310	350	45.05	45	0.226738	0.773262	636.76	0.19138	0.80862	505.413	10.2134	9.78656	5.39505	14.6049	18	41394	60	41394	159	41394	130	41394	5.08	41394	132	44	41058	0.486555	6	2.82486	41263	0.0183571	0.00936452	0.0105007	0.00940131
B117	20	315	F	2	LZ	41311	384	46.02	47	0.290112	0.709888	888.067	0.33937	0.66063	544.817	8.37087	11.6291	4.84912	15.1509	19	41394	27	41394	115	41394	476	41394	11.64	41394	60	67	41058			11.9097	41263	0.0282829	0.00427897	0.0066159	0.0048155
B119	9	310	M	2	LZ	41324	453	46.54	49	0.228356	0.771644	701.937	0.153486	0.846514	454.24	7.96511	12.0349	4.483	15.517	20	41393	42	41393	188	41393	115	41393	6.89	41393	132	65	41058	0.486555	14	3.92251	41262	0.0217458	0.0100898	0.0162051	0.0135647
B120	0	311	F	2	ZL	41324	433	43.75	39	0.249791	0.750209	696.007	0.22276	0.77724	552.897	8.03868	11.9613	4.89256	15.1074	13	41393	44	41393	118	41393	91	41393	2.69	41393	142	61	41058	0.322689	14	3.34418	41262	0.0206863	0.00599198	0.00689699	0.00936232
B121	0	311	M	2	ZL	41309	354	46	49	0.204432	0.795568	547.42	0.214902	0.785098	418.593	8.1295	11.8705	5.35117	14.6488	18	41394	111	41394	215	41394	227	41394	7.73	41394	80	53	41058	0.6	8	4.34007	41263	0.0187246	0.00508771	0.00627738	0.00908003
B122	0	293	M	2	control	41311	348	47.55	43	0.250569	0.749431	802.117	0.161111	0.838889	426.523	8.46895	11.5311	4.84168	15.1583	20	41394	119	41394	238	41394	91	41394	7.33	41394	158	58	41058	0.485772	5	3.24255	41263	0.0284636	0.0139227	0.0125163	0.00932113
B123	3	276	M	2	control	41311	416	45.74	44	0.177793	0.822207	606.027	0.149992	0.850008	468.963	8.75575	11.2442	4.6966	15.3034	23	41390	49	41390	163	41390	169	41390	7.45	41390	66	78	41059	0.787146	15	2.65418	41262	0.0173825	0.0122808	0.0129416	0.00886845
B124	0	386	M	2	ZL	41310	459	47.66	38	0.0888891	0.911111	464.363	0.120364	0.879636	504.71					16	41396	36	41396	185	41396	126	41396	8.11	41396						4.23314	41263	0.0210083	0.0107083	0.0123193	0.0258037
B125	0	386	F	2	ZL	41311	357	43.94	42	0.216236	0.783764	490.447	0.15505	0.84495	454.62	9.50745	10.4925	4.76574	15.2343	21	41389	44	41389	227	41389	141	41389	4.88	41389	116	36	41058	0.277067	15	3.48088	41262	0.0218874	0.0159588	0.0139619	0.0315341
B126	0	381	M	2	LZ	41324	442	46.9	50	0.216518	0.783482	705.2	0.167573	0.832427	571.473	9.50389	10.4961	4.66761	15.3324	18	41393	33	41393	188	41393	123	41393	4.65	41393	134	56	41059	0.332919	14	4.77913	41262	0.0224847	0.0130302	0.0242435	0.0185803
B127	0	388	M	2	ASTA	41326	438	47.94	43	0.260381	0.739619	711.673	0.221902	0.778098	545.317	10.2084	9.79161	4.43332	15.5667	20	41394	51	41394	164	41394	87	41394	10.09	41394	162	56	41058	0.763445	5	3.04121	41263	0.0210991	0.0108087	0.00744428	0.0075652
B128	2	321	M	2	ZL	41304	402	45.69	46	0.154812	0.845188	372.213	0.140389	0.859611	455.79	8.61379	11.3862	4.97351	15.0265	21	41394	59	41394	189	41394	409	41394	14.06	41394	128	44	41058	0.76791	9	4.17006	41263	0.0271298	0.0116531	0.0154153	0.0294373
B129	0	384	F	2	control	41324	381	42.08	46	0.214013	0.785987	752.26	0.191684	0.808316	548.817	9.63271	10.3673	4.48807	15.5119	17	41393	121	41393	217	41393	168	41393	3.09	41393				0.358065	15	4.99213	41262	0.0254121	0.0104446	0.0107982	0.00793758
B130	0	384	M	2	control	41311	433	48.61	42	0.244246	0.755754	856.697	0.144513	0.855487	480.703	8.64402	11.356	4.77822	15.2218	16	41390	82	41390	295	41390	185	41390	6.55	41390	134	55	41058	0.473635	15	2.62454	41262	0.0224296	0.0109042	0.0111947	0.00793979
B131	7	387	F	2	LZ	41304	438	46.18	34	0.252904	0.747096	901.69	0.239644	0.760356	479.74	10.1176	9.8824	4.658	15.342	14	41396	21	41396	130	41396	552	41396	3.88	41396				0.340576	9	5.74333	41263	0.0145316	0.00399684	0.0066221	0.0048596
B132	7	387	M	2	LZ	41310	451	48.21	47	0.205771	0.794229	849.707	0.132126	0.867874	484.883	6.71648	13.2835	4.6477	15.3523	21	41394	85	41394	239	41394	124	41394	5.7	41394	76	90	41058	0.444075	6	6.22884	41263	0.0234016	0.0117905	0.0201996	0.0170726
B133	0	319	F	2	control	41311	458	44.09	43	0.211788	0.788212	391.16	0.175871	0.824129	516.967	8.47529	11.5247	4.96252	15.0375	22	41390	20	41390	142	41390	799	41390	4.25	41390	118	73	41059	0.378828	15	3.34143	41262	0.0210262	0.0113652	0.0123418	0.00889958
B134	0	319	M	2	control	41304	391	45.31	50	0.223964	0.776036	812.793	0.264682	0.735318	426.437	7.76249	12.2375	4.62137	15.3786	22	41394	138	41394	271	41394	293	41394	8.7	41394	78	67	41059	0.6	5	4.07822	41263	0.0203422	0.00931719	0.0127422	0.00922433
B135	2	321	F	2	ZL	41326	445	43.1	48	0.220371	0.779629	525.463	0.152603	0.847397	491.347	8.47178	11.5282	4.79832	15.2017	20	41394	26	41394	190	41394	186	41394	8.27	41394	120	47	41058	0.410924	6	4.87914	41263	0.0229155	0.00958119	0.0145498	0.0271531
B136	5	379	F	2	ASTA	41310	449	48.81	51	0.167289	0.832711	380.297	0.166035	0.833965	465.477	7.16005	12.8399	4.74362	15.2564	25	41394	55	41394	281	41394	1082	41394	5.67	41394	134	44	41059	0.420809	9	10.9572	41263	0.0219639	0.00516035	0.00527212	0.00450362
B137	4	369	F	2	ASTA	41311	432	43.92	36	0.227899	0.772101	475.75	0.154854	0.845146	473.067	7.98387	12.0161	4.45446	15.5455	17	41390	18	41390	127	41390	196	41390	10.7	41390	60	71	41059	0.516667	14	6.67302	41262	0.0168266	0.0061713	0.00508471	0.0041955
B139	11	383	M	2	ZL	41309	440	46.27	43	0.208886	0.791114	928.287	0.166366	0.833634	463.673	8.2527	11.7473	4.45498	15.545	23	41394	80	41394	204	41394	136	41394	7.28	41394	136	57	41058	0.308171	6	4.988	41263	0.0202534	0.0145774	0.0137829	0.0298532
B141	8	385	M	2	ASTA	41305	443	48.07	47	0.252296	0.747704	635.593	0.109595	0.890405	467.713	8.48806	11.5119	4.69754	15.3025	24	41394	46	41394	250	41394	166	41394	5.15	41394	80	72	41058	0.694862	6	4.7224	41263	0.0162696	0.0119208	0.00737274	0.00759177
B142	8	385	F	2	ASTA	41310	431	44.72	35	0.247352	0.752648	503.517	0.142854	0.857146	448.1	10.6965	9.30347	4.46783	15.5322	17	41396	41	41396	141	41396	558	41396	8.76	41396	160	48	41058			7.50814	41263	0.0238899	0.00515994	0.00498555	0.00398925
B143	5	379	M	2	ASTA	41310	466	46.7	52	0.27839	0.72161	919.37	0.251687	0.748313	556.157	7.39039	12.6096	4.4472	15.5528	21	41394	68	41394	244	41394	129	41394	5.32	41394	118	64	41059	0.433333	5	5.65156	41263	0.0249206	0.0158713	0.00776639	0.00739422
B146	0	376	M	2	LZ	41310	473	46.83	53	0.207884	0.792116	683.183	0.110881	0.889119	498.433	7.66067	12.3393	5.05153	14.9485	18	41394	32	41394	166	41394	171	41394	7.12	41394	120	59	41059	0.424903	6	5.8633	41263	0.0192928	0.00761793	0.0141719	0.0115227
B147	0	376	F	2	LZ	41311	386	42.99	47	0.162543	0.837457	587.92	0.120263	0.879737	534.433	7.42794	12.5721	4.29549	15.7045	19	41394	31	41394	139	41394	173	41394	7.68	41394	70	72	41059	0.461723	5	2.54582	41263	0.0231503	0.0102496	0.0188936	0.0146463
B148	12	377	M	2	control	41324	386	45.15	42	0.162371	0.837629	792.943	0.137175	0.862825	416.873	7.44707	12.5529	4.94964	15.0504	21	41390	61	41390	200	41390	181	41390	10.8	41390	84	48	41059	0.65618	15	3.58534	41262	0.0290757	0.00898035	0.0112664	0.00796622
B149	3	374	M	2	ASTA	41324	434	47.05	51	0.2	0.8	461.37	0.185391	0.814609	466.017	7.37166	12.6283	4.69799	15.302	18	41393	40	41393	172	41393	110	41393	7.4	41393	118	48	41059	0.668323	14	7.37924	41262	0.0232112	0.0127414	0.00631866	0.00622416
B150	3	374	F	2	ASTA	41310	412	43.1	37	0.179921	0.820079	547.963	0.234678	0.765322	612.957	8.65239	11.3476	4.77087	15.2291	25	41394	37	41394	187	41394	1079	41394	9.7	41394	60	60	41059	0.680745	8	7.39306	41263	0.0224287	0.00487951	0.00480478	0.00382403
B151	0	373	M	2	ASTA	41309	441	45.54	47	0.196918	0.803082	762.107	0.13122	0.86878	317.063	9.56232	10.4377			17	41396	99	41396	204	41396	89	41396	9.77	41396	60	60	41059	0.804969	8	5.9221	41263	0.0190715	0.012554	0.00632062	0.00602274
B152	0	373	F	2	ASTA	41304	381	43.05	44	0.203804	0.796196	563.353	0.230902	0.769098	450.41	9.43064	10.5694	4.67895	15.321	24	41394	55	41394	189	41394	135	41394	12.67	41394	112	50	41059	0.804969	8			0.0265857	0.012891	0.00738043	0.00746448
B153	0	372	M	2	control	41324	407	44.82	51	0.242057	0.757943	520.817	0.134955	0.865045	550.937	7.76239	12.2376	4.6088	15.3912	21	41390	61	41390	190	41390	143	41390	7.23	41390	130	54	41059	0.397468	14	3.21099	41262	0.0231136	0.00830312	0.010207	0.00765754
B154	6	371	M	2	LZ	41326	411	45.57	50	0.228788	0.771212	519.797	0.126281	0.873719	430.913	10.4911	9.5089	4.95388	15.0461	18	41394	41	41394	148	41394	74	41394	4.86	41394	154	64	41059	0.246749	5	3.45043	41263	0.0190912	0.00704477	0.0113317	0.0094934
B155	0	370	M	2	ZL	41316	430	45.35	47	0.20312	0.79688	488.387	0.154138	0.845862	452.83	7.47737	12.5226	4.78396	15.216	20	41390	80	41390	227	41390	148	41390	7.95	41390	128	50	41059	0.37707	9	2.32622	41260	0.0311724	0.0151739	0.0140716	0.0319324
B156	4	369	M	2	ASTA	41324	444	44.84	41	0.258769	0.741231	778.77	0.208111	0.791889	476.827	11.691	8.30904	4.32464	15.6754	15	41393	55	41393	164	41393	78	41393	7.13	41393	60	79	41059	0.670681	17	2.88135	41262	0.0251755	0.00812784	0.00569398	0.00519338
B158	2	367	M	2	control	41309	432	45.13	49	0.221355	0.778645	512.347	0.210726	0.789274	578.293	8.50482	11.4952	4.47357	15.5264	25	41394	64	41394	244	41394	166	41394	6.9	41394	60	60	41058	0.43237	9	5.81229	41263	0.0261467	0.0118242	0.0172518	0.0117924
B159	0	365	M	2	control	41311	480	49.09	50	0.196485	0.803515	690.507	0.124231	0.875769	514.523	6.56684	13.4332	5.01258	14.9874	17	41394	34	41394	121	41394	118	41394	5.98	41394	148	62	41058	0.433631	6	1.87669	41263	0.0191998	0.0069114	0.0110172	0.00779435
B160	0	364	M	2	ZL	41304	408	46.99	39	0.189044	0.810956	638.9	0.203049	0.796951	383.957	10.5706	9.42939	4.51393	15.4861	18	41394	94	41394	181	41394	152	41394	7.23	41394	72	54	41058	0.436601	5	4.71501	41263	0.024083	0.0121941	0.0135672	0.0235952
B161	3	362	M	2	control	41304	387	46.18	52	0.244923	0.755077	534.567	0.157846	0.842154	519.32	9.74392	10.2561	4.92456	15.0754	23	41394	65	41394	158	41394	113	41394	7	41394	154	54	41058	0.687071	3	11.2424	41263	0.0206907	0.00847579	0.0138603	0.0100281
B162	0	361	M	2	control	41324	411	46.64	49	0.26188	0.73812	387.91	0.154772	0.845228	419.407	7.42986	12.5701	4.51925	15.4808	17	41393	42	41393	151	41393	153	41393	7.19	41393	144	40	41058	0.491129	15	4.76197	41262	0.0249129	0.0093032	0.0129623	0.00916773
B163	0	360	M	2	LZ	41310	432	46.11	53	0.22257	0.77743	626.103	0.20339	0.79661	467.573	9.76549	10.2345	4.81031	15.1897	20	41394	54	41394	223	41394	133	41394	7.46	41394	60	77	41058	0.506615	6	4.40474	41263	0.0227178	0.00954492	0.0174134	0.0146873
B164	1	359	F	2	ZL	41311	383	41.58	48	0.262346	0.737654	425.5	0.108385	0.891615	461.37	7.28407	12.7159	4.74199	15.258	14	41394	27	41394	135	41394	190	41394	7.67	41394	118	91	41059	0.452292	6	3.91868	41263	0.0169794	0.0109883	0.0157607	0.0275341
B165	14	358	M	2	ASTA	41305	457	46.65	46	0.224947	0.775053	504.343	0.167964	0.832036	491.8	10.3864	9.61356	4.96119	15.0388	19	41394	59	41394	175	41394	101	41394	9.18	41394	68	56	41059	0.946405	5	3.89675	41263	0.0229956	0.00767075	0.00604671	0.00570489
B167	6	356	M	2	control	41305	429	47.27	53	0.238925	0.761075	697.973	0.216798	0.783202	220.213	10.5765	9.42346	4.53733	15.4627	23	41394	94	41394	235	41394	194	41394	5.91	41394	112	40	41058	0.43237	9	4.95624	41263	0.0246524	0.0106463	0.0115201	0.00778014
A369	0	366	M	3	LZ	41313	402	44.7	31	0.210745	0.789255	858.54	0.182843	0.817157	496.977	7.84819	12.1518	4.98776	15.0122	17	41390	75	41390	193	41390	188	41390	4.32	41390	90	72	41092	0.420809	9	4.48182	41260	0.0236947	0.0113106	0.0155911	0.0126421
A370	4	382	M	3	LZ	41313	429	43.67	29	0.211151	0.788849	481.8	0.177854	0.822146	595.747	10.7041	9.29587	4.85157	15.1484	17	41388	22	41388	157	41388	112	41388	7.71	41388	62	66	41093	1.07541	8	2.69392	41260	0.0220779	0.0118325	0.0104903	0.00765528
A399	0	256	F	3	control	41313	320	38.56	38	0.201556	0.798444	660.723	0.209928	0.790072	594.547	6.76741	13.2326	4.03341	15.9666	17	41390	70	41390	184	41390	256	41390	5.59	41390	92	44	41093	0.515323	8	4.64795	41260	0.0298071	0.0122444	0.0102209	0.00710262
A428	13	380	M	3	ZL	41323	408	46.9	39	0.211629	0.788371	722.173	0.19161	0.80839	513.443	9.32753	10.6725	5.11057	14.8894	19	41394	71	41394	173	41394	182	41394	18.38	41394	72	79	41094	1.30449	3	1.41915	41260	0.0221444	0.0143494	0.012427	0.0248335
A429	6	309	M	3	control	41323	484	46.98	43	0.263311	0.736689	866.98	0.28057	0.71943	488.007	13.4412	6.55877	4.8493	15.1507	12	41388	46	41388	131	41388	207	41388	5.11	41388	78	56	41092			3.87595	41260	0.0276781	0.0098792	0.0087606	0.00630896
A433	0	322	F	3	ASTA	41320	345	42.34	42	0.250812	0.749188	664.213	0.167855	0.832145	458.84	9.46217	10.5378	4.89828	15.1017	22	41390	53	41390	185	41390	165	41390	7.95	41390	124	42	41093	0.727542	11	3.62776	41260	0.032112	0.0122414	0.00646932	0.00700479
A437	6	309	F	3	control	41313	367	42.47	39	0.261312	0.738688	765.387	0.203556	0.796444	408.373	15.5099	4.49011	4.9177	15.0823	21	41390	40	41390	177	41390	125	41390	9.37	41390	60	60	41092	0.463884	12	3.61401	41260	0.0299549	0.00969915	0.00760872	0.00567445
A450	0	322	M	3	ASTA	41313	455	49.47	38	0.255706	0.744294	644.473				10.7759	9.22408	4.8785	15.1215	23	41390	75	41390	238	41390	211	41390	5.37	41390	108	50	41093	0.705751	11	3.23899	41260	0.0284407	0.0116064	0.0067784	0.00698329
A453	2	363	F	3	ASTA	41323	368	46.02	46	0.248949	0.751051	684.257	0.256493	0.743507	508.947	11.1635	8.83652	5.23819	14.7618	12	41388	40	41388	127	41388	106	41388	7.93	41388	62	59	41093	0.855717	2	2.4677	41260	0.0253061	0.00784107	0.00598102	0.00577447
A455	0	304	F	3	control	41323	371	47.26	52	0.25138	0.74862	945.347	0.243857	0.756143	513.02	11.4693	8.53075	4.61066	15.3893	14	41388	105	41388	220	41388	519	41388	10.13	41388	126	61	41092	0.918087	2	3.01072	41260	0.0320655	0.0116838	0.00920056	0.00665105
A458	13	380	F	3	ZL		337	43.25	36	0.286301	0.713699	865.857	0.268268	0.731732	501.78	8.56	11.44	4.72053	15.2795											60	74	41094
A459	2	363	M	3	ASTA	41316	444	48.73	44	0.262051	0.737949	669.277	0.302051	0.697949	546.947	11.3994	8.60064	4.79621	15.2038	18	41390	45	41390	148	41390	127	41390	7.45	41390	92	45	41093	0.57235	10	1.40316	41260	0.0271046	0.0109892	0.00746165	0.00822376
A480	0	294	M	3	control	41323	417	43.82	37	0.213973	0.786027	677.487	0.165125	0.834875	439.513	11.1806	8.81942	4.57185	15.4281	13	41388	49	41388	163	41388	153	41388	3.67	41388	64	68	41094			3.49496	41260	0.0296098	0.0162513	0.0127014	0.00883782
A482	4	382	F	3	LZ	41323	431	43.34	40	0.206998	0.793002	715.4	0.228542	0.771458	626.313	8.59848	11.4015	4.74167	15.2583	14	41388	44	41388	155	41388	68	41388	5.95	41388	72	72	41093	0.681081	2	4.42579	41260	0.0267043	0.0124381	0.0179616	0.0131484
A490	3	355	M	3	LZ	41323	436	47.09	31	0.217433	0.782567	434.03	0.231953	0.768047	436.133	8.10391	11.8961	4.75407	15.2459	17	41394	53	41394	199	41394	259	41394	8.23	41394	60	68	41093	0.51314	2	2.48444	41260	0.0229616	0.0108527	0.0189414	0.0144136
A493	1	359	M	3	ZL	41320	418	44.39	38	0.229197	0.770803	495.1	0.217594	0.782406	566.33	8.08748	11.9125	4.62602	15.374	16	41389	41	41389	146	41389	156	41389	7.76	41389				0.446416	11	3.26845	41260	0.0245966	0.010896	0.0111485	0.0195781
A494	5	265	F	3	ZL	41316	381	42.07	44	0.216303	0.783697	626.063	0.210785	0.789215	652.71	6.99056	13.0094	3.87871	16.1213	18	41390	60	41390	178	41390	198	41390	9.32	41390	96	43	41092	0.822506	8	2.42121	41260	0.027541	0.0169317	0.0139724	0.0246423
A535	0	361	F	3	control	41320	330	39.19	35	0.249286	0.750714	621.327	0.218	0.782	477.907					14	41388	81	41388	167	41388	186	41388	9.46	41388	60	60	41093	0.653004	1	3.27515	41260	0.0185021	0.0117525	0.00950468	0.00671737
A571	0	388	F	3	ASTA	41316	369	45.52		0.231759	0.768241	728.84	0.300455	0.699545	701.057															120	47	41092					0.0203065	0.0107909	0.00664319	0.00642754
A578	0	365	F	3	control	41320	430	43.16	50	0.263171	0.736829	629.373	0.186177	0.813823	468.753	10.0944	9.90561	4.94483	15.0552	22	41390	128	41390	302	41390	149	41390	12.27	41390	72	54	41093	0.545092	11	2.15619	41260	0.0241492	0.0132739	0.00741301	0.00545021
A716	0	256	M	3	control	41317	508	47.89	34	0.242816	0.757184	835.003	0.191689	0.808311	607.397	8.02242	11.9776	3.91657	16.0834	14	41393	68	41393	213	41393	268	41393	10.38	41393	60	61	41093			3.07076	41261	0.0264475	0.0118596	0.00969309	0.00663484
A719	2	258	M	3	ZL	41306	426	46.45	33	0.22666	0.77334	742.96	0.212971	0.787029	779.44	7.02445	12.9755	3.74028	16.2597	18	41388	103	41388	222	41388	190	41388	10.57	41388	100	48	41093	0.634091	17	4.91251	41261	0.0249542	0.0141257	0.0146381	0.0268248
A720	2	258	F	3	ZL	41317	386	43.87	43	0.198861	0.801139	729.477	0.195437	0.804563	728.273	7.71953	12.2805	4.00631	15.9937	17	41388	93	41388	209	41388	353	41388	12.41	41388	66	57	41093	0.651873	18	4.1767	41261	0.0371694	0.0168876	0.0159485	0.0298304
A725	0	262	M	3	LZ	41318	421	41.85	43	0.255402	0.744598	612.523	0.2201	0.7799	525.93	9.5998	10.4002	4.03389	15.9661	20	41388	32	41388	175	41388	200	41388	5.9	41388	68	56	41093	0.382743	18	4.84153	41261	0.0320739	0.0117674	0.0181493	0.0145841
A726	0	262	F	3	LZ	41306	381	40.11	41	0.233987	0.766013	630.143	0.235654	0.764346	551.673	7.45391	12.5461	3.76907	16.2309	21	41389	119	41389	216	41389	195	41389	10.4	41389	66	83	41093	0.840589	18	4.29693	41261	0.0281515	0.0108569	0.0144813	0.0119307
A731	5	265	M	3	ZL	41305	448	46.39	42	0.202193	0.797807	925.593	0.182001	0.817999	698.277	8.06773	11.9323	3.86817	16.1318	18	41389	114	41389	256	41389	174	41389	13.55	41389	76	62	41092	0.752749	12	4.66718	41261	0.020819	0.018965	0.0184361	0.0347028
A732	22	266	M	3	control	41312	410	43.16	42	0.234187	0.765813	864.007	0.19426	0.80574	539.47	9.96168	10.0383	3.91502	16.085	19	41389	108	41389	236	41389	341	41389	5	41389	62	59	41092	0.397753	11	3.73248	41262	0.0242378	0.0109086	0.00956951	0.00718396
A735	22	266	F	3	control	41320	394	44.15	57	0.290688	0.709312	732.59	0.229902	0.770098	511.8	9.12342	10.8766	3.85528	16.1447	26	41388	61	41388	285	41388	1403	41388	7.21	41388				0.339669	3	8.53166	41260	0.0125177	0.00583296	0.00598038	0.00428498
A738	5	269	F	3	ASTA	41317	384	42.12	52	0.266109	0.733891	544.69	0.249476	0.750524	562.74	8.58492	11.4151	3.92535	16.0747	20	41393	28	41393	121	41393	174	41393	11.24	41393				0.704408	4	2.18466	41261	0.0401855	0.00976451	0.00592697	0.00691694
A739	5	269	M	3	ASTA	41306	414	45.13	39	0.290659	0.709341	581.053	0.249307	0.750693	658.75	10.429	9.57101	3.9069	16.0931	20	41389	61	41389	169	41389	149	41389	2.87	41389				0.344027	11	4.13172	41262	0.0283146	0.00881727	0.00570261	0.00498464
A740	0	272	M	3	LZ	41320	465	49.79	42	0.193563	0.806437	455.803	0.173697	0.826303	504.053	8.43217	11.5678	3.86203	16.138	20	41394	101	41394	221	41394	185	41394	9.56	41394						2.97937	41261	0.0306098	0.0156654	0.0188542	0.0158721
A741	0	272	F	3	LZ	41318	345	46.65	48	0.207793	0.792207	753.903	0.261679	0.738321	637.013	10.3096	9.69039	3.83658	16.1634	15	41388	48	41388	154	41388	167	41388	13.03	41388						3.75964	41261	0.024866	0.0161615	0.0156968	0.0122358
A743	3	274	F	3	ASTA	41317	415	44.29	35	0.267038	0.732962	786.053	0.208785	0.791215	542.463	8.87222	11.1278	3.6896	16.3104	16	41393	69	41393	161	41393	135	41393	3.49	41393	64	67	41092	0.370053	17	3.35726	41261	0.0294698	0.00852058	0.00640827	0.0065862
A744	3	274	M	3	ASTA	41320	422	43.4	42	0.276081	0.723919	658.253	0.302848	0.697152	591.343	9.44384	10.5562	3.65513	16.3449	22	41388	81	41388	197	41388	145	41388	13.14	41388	62	99	41092			3.57403	41260	0.0311234	0.00920535	0.00631187	0.00660496
A747	3	288	M	3	control	41312	445	47.49	35	0.224056	0.775944	752.93	0.208946	0.791054	500.393	12.13	7.87002	4.5601	15.4399	17	41389	143	41389	267	41389	234	41389	4.57	41389	102	46	41093	0.405846	12	2.99848	41262	0.0331618	0.00977917	0.0107807	0.00782925
A757	13	273	M	3	ZL	41317	466	48.81	33	0.204622	0.795378	734.39	0.205639	0.794361	600.593	7.80119	12.1988	3.61543	16.3846	16	41393	89	41393	237	41393	199	41393	11.79	41393	60	60	41092	0.667332	4	2.66073	41261	0.0240358	0.0141607	0.0123564	0.0223504
A758	10	286	M	3	ASTA	41312	392	46.08	40	0.278892	0.721108	730.313	0.202357	0.797643	456.08	7.73395	12.2661	4.63121	15.3688	19	41389	46	41389	203	41389	278	41389	14.05	41389	60	75	41092	0.850951	14	2.21949	41262	0.0243707	0.0100419	0.00722945	0.00844554
A761	3	276	F	3	control	41317	376	44.71	40	0.285702	0.714298	630.743	0.249544	0.750456	596.203	9.36097	10.639	3.66567	16.3343											60	72	41094	0.316578	17	2.71435	41261	0.0231567	0.00595124	0.00749658	0.00564783
A762	3	288	F	3	control	41311	381	44.19	45	0.239413	0.760587	840.487	0.283906	0.716094	526.11	13.0497	6.95028	4.56918	15.4308	21	41390	33	41390	159	41390	88	41390	3.93	41390	138	54	41092	0.457143	14	4.11157	41262	0.030956	0.00996294	0.00993864	0.00718794
A763	1	289	F	3	LZ	41309	352	42.25	39	0.205557	0.794443	838.557	0.144973	0.855027	472.05	9.04762	10.9524	4.66031	15.3397	22	41388	134	41388	271	41388	154	41388	7.13	41388	104	42	41093	0.437349	18	1.95438	41261	0.0274338	0.0125261	0.0182146	0.0171852
A764	1	289	M	3	LZ	41320	425	45.15	39	0.205121	0.794879	652.043	0.225411	0.774589	477.23	9.84376	10.1562	4.65902	15.341	21	41388	100	41388	280	41388	229	41388	11.68	41388	96	45	41093			2.80186	41260	0.0333896	0.0208874	0.0240807	0.0219705
A765	1	290	F	3	ZL	41317	385	45.98		0.206363	0.793637	818.46	0.167699	0.832301	489.723	8.78568	11.2143	4.3971	15.6029	22	41393	51	41393	166	41393	146	41393	8.75	41393	116	51	41093	0.622355	18	2.33805	41261	0.032863	0.0112	0.0137777	0.0248485
A766	1	290	M	3	ZL	41312	456	47.45	40	0.228066	0.771934	880.11	0.178237	0.821763	497.26	6.99369	13.0063	4.4726	15.5274	23	41389	167	41389	322	41389	131	41389	9.7	41389	114	46	41093	0.769102	12	6.85738	41262	0.0325454	0.0256856	0.018632	0.0357911
A770	0	294	F	3	control	41311	387	44.5	36	0.183448	0.816552	526.51	0.197077	0.802923	434.213	8.70744	11.2926	4.87202	15.128	24	41390	60	41390	221	41390	193	41390	8.05	41390	76	71	41094	0.445238	14	2.87021	41262	0.0277445	0.0104924	0.00992519	0.00719364
A776	2	297	M	3	ASTA	41326	418	47.18	41	0.288208	0.711792	844.617	0.264586	0.735414	491.703	11.2888	8.7112	5.22263	14.7774	23	41389	100	41389	253	41389	137	41389	9.11	41389				0.938262	14	3.36663	41262	0.0312539	0.0136717	0.00585527	0.00568204
A777	2	297	F	3	ASTA	41318	395	44.5	39	0.255816	0.744184	792.407	0.277763	0.722237	481.55	9.53773	10.4623	5.18454	14.8155	19	41388	67	41388	187	41388	77	41388	4.28	41388	94	52	41092	0.408725	17	3.03869	41261	0.0302931	0.0150494	0.00687268	0.00734712
A782	20	300	M	3	LZ	41312	394	45.7	37	0.223046	0.776954	959.143	0.212691	0.787309	495.98	9.92509	10.0749	4.67951	15.3205	21	41389	41	41389	179	41389	109	41389	4.18	41389	132	66	41092	0.339372	14	3.44368	41262	0.0316537	0.00617092	0.016803	0.0131992
A783	20	300	F	3	LZ	41306	447	44.79	33	0.299445	0.700555	802.707	0.268906	0.731094	512.967	12.1157	7.88429	5.13065	14.8693	19	41389	104	41389	190	41389	142	41389	5.55	41389	82	49	41092	0.440864	12	3.36398	41262	0.0193391	0.0127279	0.0136505	0.0101397
A785	0	370	F	3	ZL	41309	375	43.51	42	0.220297	0.779703	506.457	0.177784	0.822216	447.647	11.0952	8.90484	4.85382	15.1462	15	41388	101	41388	200	41388	157	41388	7.1	41388				0.67047	17	3.12974	41261	0.0214147	0.0113137	0.0108212	0.020904
A788	0	285	M	3	ZL	41317	448	47.15	38	0.238821	0.761179	963.7	0.20428	0.79572	485.653	9.00867	10.9913	4.25407	15.7459	16	41393	113	41393	261	41393	135	41393	5.87	41393	74	53	41092	0.412968	4	2.2324	41261	0.028211	0.0187549	0.0145626	0.0255508
A789	0	285	F	3	ZL	41305	327	40.5	38	0.212112	0.787888	712.863	0.195812	0.804188	512.973	11.136	8.86397	4.68877	15.3112	16	41390	90	41390	189	41390	195	41390	6.57	41390	68	69	41092	0.385358	11	5.00947	41261	0.0276749	0.0158687	0.0138437	0.0233487
A790	14	301	M	3	ZL	41306	502	40.15	42	0.211483	0.788517	607.667	0.196525	0.803475	461.37	8.44836	11.5516	4.65772	15.3423	23	41393	99	41393	250	41393	206	41393	6.7	41393	160	63	41092	0.379051	19	2.46492	41261	0.0260837	0.0156026	0.0126876	0.0264222
A791	14	301	F	3	ZL	41320	355	41.55	38	0.246878	0.753122	770.457	0.246624	0.753376	475.087	10.6008	9.39925	4.97164	15.0284	25	41388	90	41388	231	41388	375	41388	8.4	41388						2.04665	41260	0.0350251	0.0128973	0.0122404	0.0236094
A792	12	302	F	3	ASTA	41309	322	40.71	41	0.251106	0.748894	593.377	0.230659	0.769341	425.107	12.0031	7.99693	5.16548	14.8345	21	41388	119	41388	227	41388	169	41388	4.13	41388				0.270376	17	3.70766	41261	0.0295937	0.0112867	0.00653648	0.00658643
A793	12	302	M	3	ASTA	41306	404	47.72	37	0.277977	0.722023	783.803	0.260424	0.739576	525.65	11.8304	8.16964	4.73514	15.2649	19	41389	73	41389	179	41389	139	41389	7.09	41389				0.518919	11	3.86539	41262	0.0197685	0.01043	0.00580109	0.00560859
A794	0	304	M	3	control	41317	386	44.62	38	0.192274	0.807726	813.763	0.274713	0.725287	514.143	9.46458	10.5354	4.92441	15.0756	15	41393	49	41393	148	41393	169	41393	4.8	41393				0.242289	17	2.37942	41261	0.0218161	0.00714803	0.00743538	0.00533451
A798	0	372	F	3	control	41320	351	41.1	40	0.201268	0.798732	537.43	0.212313	0.787687	530.13	8.8281	11.1719	4.98554	15.0145	16	41393	132	41393	212	41393	152	41393	5.44	41393	94	57	41092			3.32837	41261	0.0257712	0.0121463	0.00919247	0.00658986
B102	18	277	M	3	LZ	41311	476	48.14	36	0.21673	0.78327	694.707	0.18752	0.81248	545.697	8.6891	11.3109	4.1287	15.8713	21	41394	65	41394	176	41394	206	41394	5.43	41394	70	72	41093	0.47395	6	3.52613	41263	0.0266235	0.0167281	0.0191092	0.0146967
B105	0	366	F	3	LZ	41323	365	42.17	40	0.163738	0.836262	461.07	0.182261	0.817739	575.587	9.92952	10.0705	4.82966	15.1703	16	41393	99	41393	205	41393	258	41393	7.82	41393	64	60	41092	0.6	15	1.52179	41262	0.0300386	0.00835439	0.0116833	0.0102196
B112	6	318	M	3	LZ	41324	486	44.71	49	0.222681	0.777319	481.92	0.200386	0.799614	552.067	10.4907	9.50935	4.89279	15.1072	17	41393	51	41393	150	41393	225	41393	11.97	41393						4.03934	41262	0.0307526	0.00638524	0.0116858	0.00964257
B114	3	312	F	3	ASTA	41324	362	43.95		0.228354	0.771646	611.94	0.289421	0.710579	621.6	10.9892	9.01083	4.53011	15.4699	16	41393	37	41393	135	41393	194	41393	6	41393	64	58	41093	0.56732	15	2.29964	41262	0.0254027	0.00581757	0.00522093	0.00481924
B115	3	312	M	3	ASTA	41324	421	45.09	36	0.244153	0.755847	427.8	0.313034	0.686966	658.877	8.38942	11.6106	5.02025	14.9798	18	41393	63	41393	183	41393	131	41393	7.23	41393	66	66	41093	0.67563	14	3.73839	41262	0.0251091	0.0104942	0.00669894	0.00650057
B119	14	310	M	3	LZ	41324	443	46.54	47	0.247837	0.752163	747.67	0.15731	0.84269	540.65	9.6465	10.3535	5.13755	14.8624	16	41393	62	41393	195	41393	140	41393	6.47	41393	136	54	41092	0.552569	15	3.12497	41262	0.0237391	0.0153996	0.0202655	0.0153138
B120	0	311	F	3	ZL	41324	357	43.75	41	0.260894	0.739106	756.507	0.241494	0.758506	604.353	7.65672	12.3433	4.95901	15.041	14	41393	62	41393	143	41393	184	41393	6.27	41393	80	61	41093	0.65042	14	1.27064	41262	0.0273419	0.0100658	0.0102944	0.0185434
B121	0	311	M	3	ZL	41309	443	46	40	0.197863	0.802137	590.26	0.226965	0.773035	569.637	9.08438	10.9156	4.57249	15.4275	20	41394	42	41394	97	41394	721	41394	9.28	41394	64	58	41092	0.410277	5	2.27404	41263	0.0239589	0.00916437	0.0112714	0.0206811
B123	3	276	M	3	control	41311	406	45.74	40	0.205618	0.794382	874	0.221521	0.778479	485.073	9.81753	10.1825	3.88152	16.1185	19	41390	28	41390	168	41390	186	41390	5.34	41390	68	80	41094	0.741777	15	2.96788	41262	0.0197837	0.0124191	0.0106945	0.00722831
B124	0	386	M	3	ZL	41310	464	47.66	35	0.165715	0.834285	587.17	0.194992	0.805008	675.173	8.49622	11.5038	4.67502	15.325	17	41394	86	41394	191	41394	109	41394	9.5	41394	130	46	41093	0.674074	6	3.41505	41263	0.0264095	0.0125748	0.0150012	0.0280416
B125	0	386	F	3	ZL	41311	365	43.94	41	0.191874	0.808126	620.797	0.16402	0.83598	505.253	11.5229	8.47707	4.9012	15.0988	18	41389	77	41389	290	41389	161	41389	7.08	41389	62	77	41092	0.295788	15	3.9764	41262	0.0244166	0.0206929	0.0159634	0.0332925
B127	0	388	M	3	ASTA	41326	443	47.94	38	0.24355	0.75645	485.247	0.253216	0.746784	789.357	9.64419	10.3558	4.63627	15.3637	18	41394	76	41394	178	41394	81	41394	10.25	41394	60	88	41092	0.816169	5	2.3856	41263	0.0241294	0.010072	0.0066872	0.00740401
B128	3	321	M	3	ZL	41304	433	45.69	40	0.208866	0.791134	507.95	0.172655	0.827345	521.187					24	41394	119	41394	268	41394	529	41394	15.63	41394	116	53	41093	0.886765	5	3.59748	41263	0.0331541	0.0165631	0.0180613	0.0349273
B129	0	384	F	3	control	41324	362	42.08	38	0.250192	0.749808	934.52	0.216477	0.783523	542.13	10.1031	9.89687	4.96027	15.0397	18	41393	114	41393	193	41393	115	41393	3.59	41393	60	79	41093	0.333871	15	3.36377	41262	0.0250792	0.00933258	0.0086272	0.0061703
B130	0	384	M	3	control	41311	430	48.61	39	0.27915	0.72085	686.673	0.251015	0.748985	499.253	11.8097	8.19034	5.0356	14.9644	22	41390	45	41390	142	41390	179	41390	7.64	41390	114	54	41093	0.514934	15	2.77999	41262	0.0285318	0.0117441	0.00926212	0.00648997
B133	0	319	F	3	control	41311	363	44.09	40	0.275108	0.724892	650.243	0.236296	0.763704	521.97	9.84078	10.1592	4.64511	15.3549	24	41390	79	41390	206	41390	136	41390	7.54	41390	74	53	41093	0.498734	14	3.77215	41262	0.0260241	0.0128113	0.0102944	0.00726856
B134	0	319	M	3	control	41304	444	45.31	39	0.278339	0.721661	743.833	0.243233	0.756767	572.477	10.9692	9.03084	4.63479	15.3652	19	41396	129	41396	270	41396	282	41396	7.3	41396	98	55	41093			3.46823	41263	0.0223889	0.0156116	0.0115795	0.00779417
B135	3	321	F	3	ZL	41326	382	43.1	35	0.197069	0.802931	352.803	0.257083	0.742917	426.417	10.497	9.503	4.90335	15.0966	19	41394	23	41394	146	41394	254	41394	7.28	41394	96	42	41093	0.511765	6	3.56078	41263	0.0284254	0.00955135	0.0122061	0.0232505
B136	7	379	F	3	ASTA	41310	414	48.81	37	0.271869	0.728131	591.217	0.249756	0.750244	539.797	11.7882	8.21184	4.96487	15.0351	20	41394	111	41394	245	41394	135	41394	4.65	41394	64	79	41094	0.335294	5	5.09525	41263	0.0250412	0.0168952	0.00829073	0.00708235
B143	7	379	M	3	ASTA	41310	458	46.7	41	0.240271	0.759729	713.463	0.262263	0.737737	756.89	8.64713	11.3529	4.69364	15.3064	18	41394	80	41394	212	41394	197	41394	6.56	41394	112	47	41093	0.552381	5	1.49005	41263	0.0302737	0.0140066	0.00790428	0.0073821
B146	0	376	M	3	LZ	41310	475	46.83	39	0.253065	0.746935	814.533	0.187742	0.812258	526.597	8.35835	11.6416	4.46241	15.5376	22	41394	74	41394	227	41394	156	41394	7.41	41394	68	56	41092	0.87907	8	4.09902	41263	0.0237862	0.0135786	0.0213163	0.0163709
B147	0	376	F	3	LZ	41311	381	42.99	42	0.211095	0.788905	655.02	0.20207	0.79793	567.827	10.9827	9.01734	4.7645	15.2355	19	41394	32	41394	110	41394	183	41394	8.34	41394				0.606012	5	2.1994	41263	0.0282959	0.0130705	0.0165611	0.0128906
B151	0	373	M	3	ASTA	41309	448	45.54	42	0.264329	0.735671	598.537	0.207211	0.792789	447.677	11.023	8.97696	4.6027	15.3973	16	41394	53	41394	152	41394	127	41394	7.43	41394	124	73	41092	0.528854	6	4.11547	41263	0.0263005	0.0134736	0.00622793	0.00607983
B152	0	373	F	3	ASTA	41304	378	43.05	37	0.231625	0.768375	637.17	0.251943	0.748057	583.757	8.14363	11.8564	4.53381	15.4662	21	41394	69	41394	202	41394	139	41394	3.85	41394	78	81	41092			3.64901	41263	0.0254276	0.0104365	0.00588929	0.00600838
B153	0	372	M	3	control	41324	403	44.82	40	0.271833	0.728167	527.557	0.212743	0.787257	692.703	9.9055	10.0945	4.91132	15.0887	19	41390	129	41390	255	41390	299	41390	10.61	41390				0.940336	16	1.97302	41262	0.0294162	0.0111194	0.00911619	0.00670021
B155	0	370	M	3	ZL	41316	424	45.35	42	0.194971	0.805029	467.66	0.16696	0.83304	501.587	7.13885	12.8612	4.56404	15.436	13	41390	77	41390	187	41390	150	41390	7.79	41390				0.478981	9	2.30585	41260	0.0285478	0.0152344	0.0117614	0.0264551
B159	0	365	M	3	control	41311	482	49.09	52	0.254031	0.745969	543.45	0.205819	0.794181	560.907	8.19004	11.81	4.88182	15.1182	19	41394	112	41394	233	41394	270	41394	9.45	41394	66	57	41092	0.465832	6	4.02261	41263	0.0260626	0.0148523	0.0134915	0.00907842
B162	0	361	M	3	control	41324	421	46.64	33	0.300845	0.699155	654.017	0.217431	0.782569	466.77	8.8333	11.1667	4.944	15.056	15	41393	49	41393	125	41393	194	41393	5.78	41393				0.539866	14	3.57616	41262	0.0229281	0.00773413	0.0090644	0.0064588
B164	1	359	F	3	ZL	41311	359	41.58	40	0.140711	0.859289	646.723	0.186344	0.813656	621.167					17	41394	53	41394	163	41394	133	41394	6.97	41394				0.503226	6	3.36387	41263	0.0260027	0.0164736	0.0122615	0.0209247
