# Supplementary material for: Specific carotenoid pigments in the diet and a bit of oxidative stress in the recipe for producing red carotenoid-based signals
Source: PeerJ journal article supplement (doi:10.7717/peerj.2237), 2016-09-01
Supplement: Supplemental_Information_figures_and_tables.pdf [file Supplemental_Information_figures_and_tables.pdf]

## Supplementary material

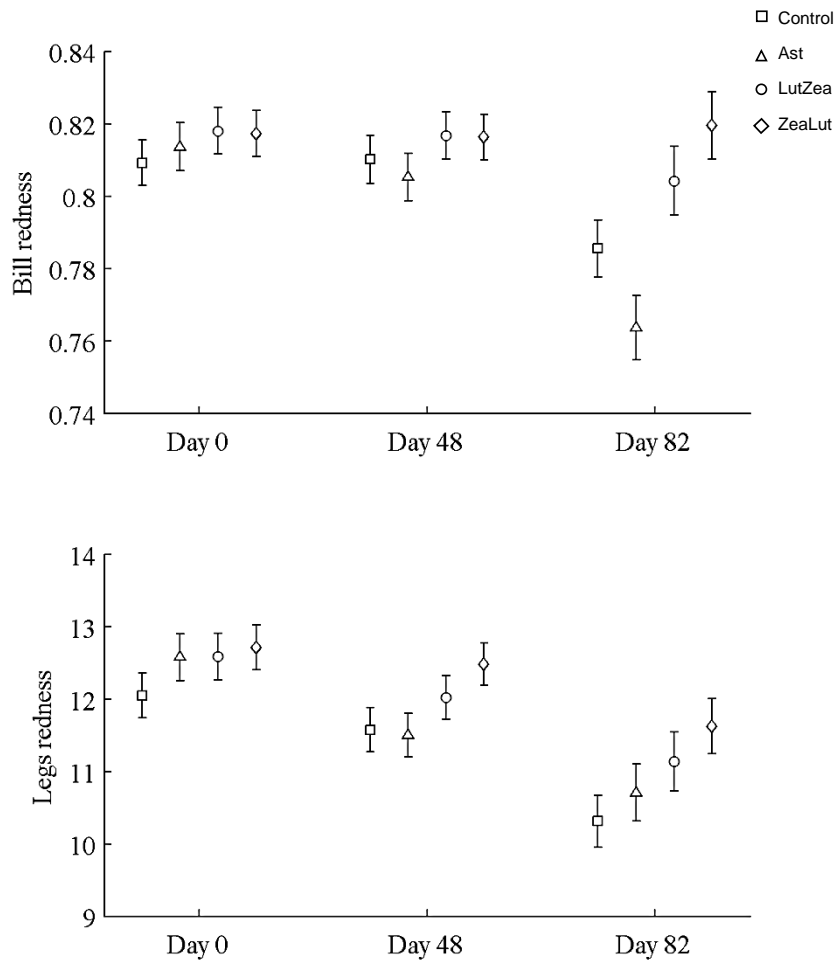

**Figure 1SM:** Changes in ornament coloration during the experiment depending on the carotenoid treatment. Least squared means  $\pm$  se were obtained from the models (see Methods and table 1).

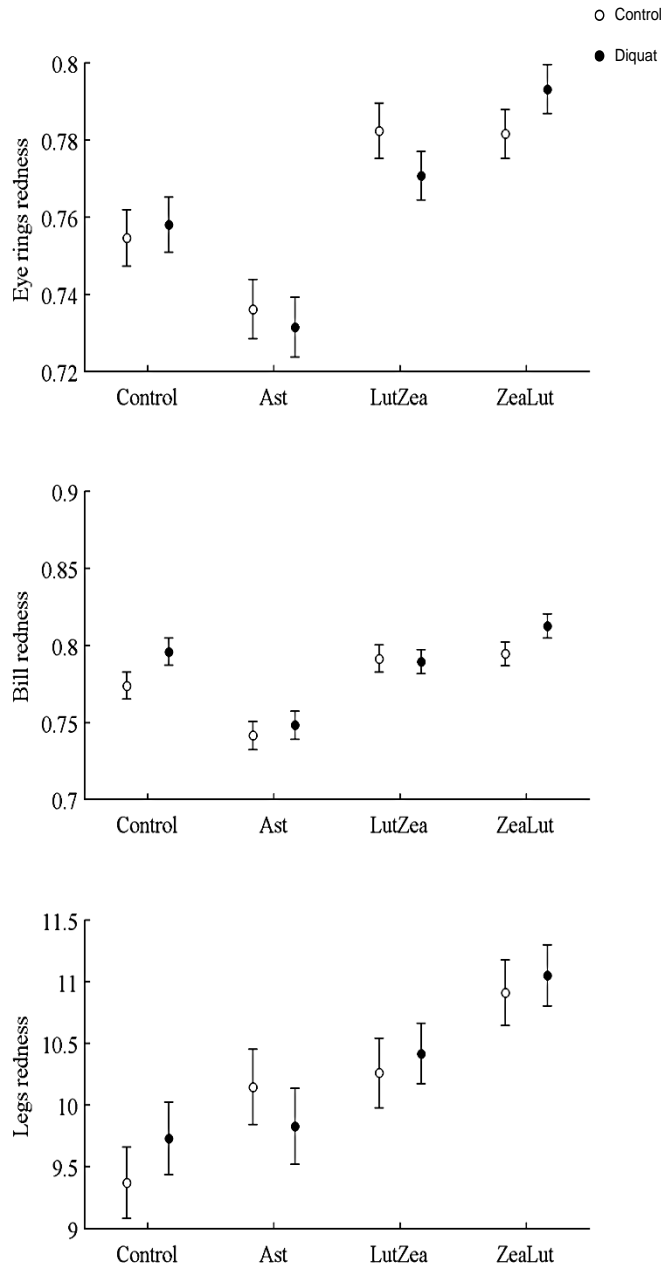

**Figure 2SM:** Changes in ornament coloration after diquat exposure depending on the carotenoid treatment. Least squared means  $\pm$  se from the models (see Methods and table 3).

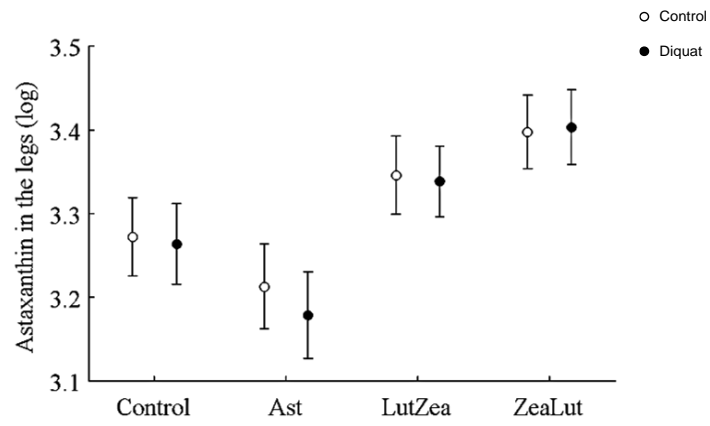

**Figure 3SM:** Levels of astaxanthin in the legs after diquat exposure depending on the carotenoid treatment. Least squared means  $\pm$  se from the models (see Methods and table 3).

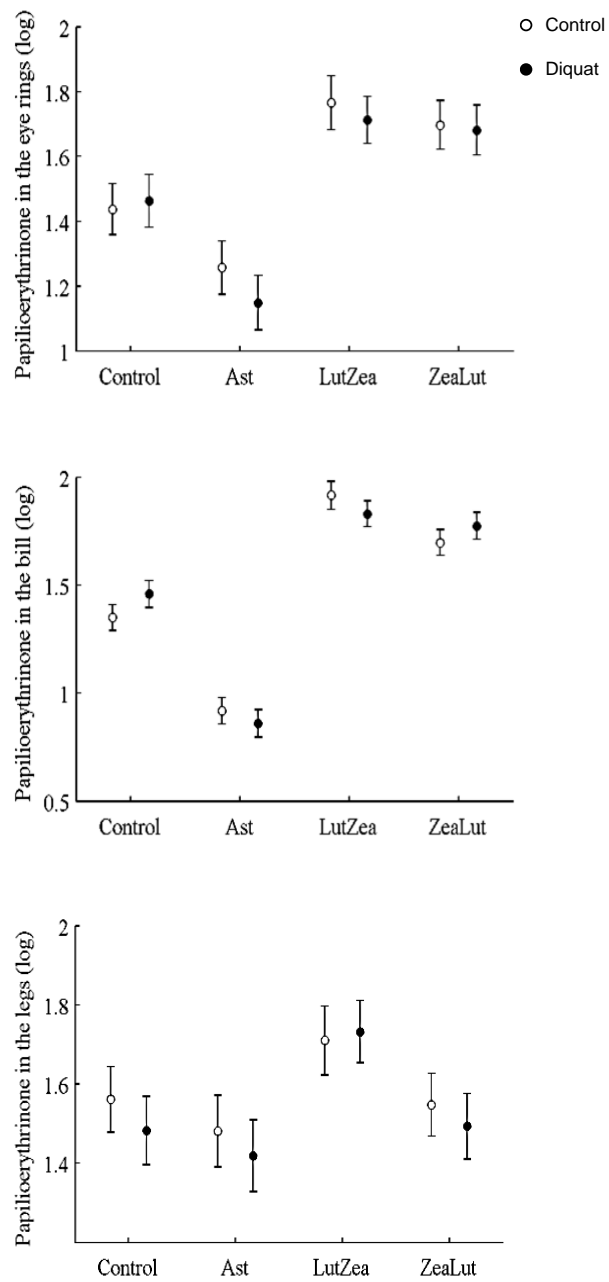

**Figure 4SM:** Levels of papilioerythrinone in the three ornaments after diquat exposure depending on the carotenoid treatment. Least squared means  $\pm$  se from the models (see Methods and table 3).

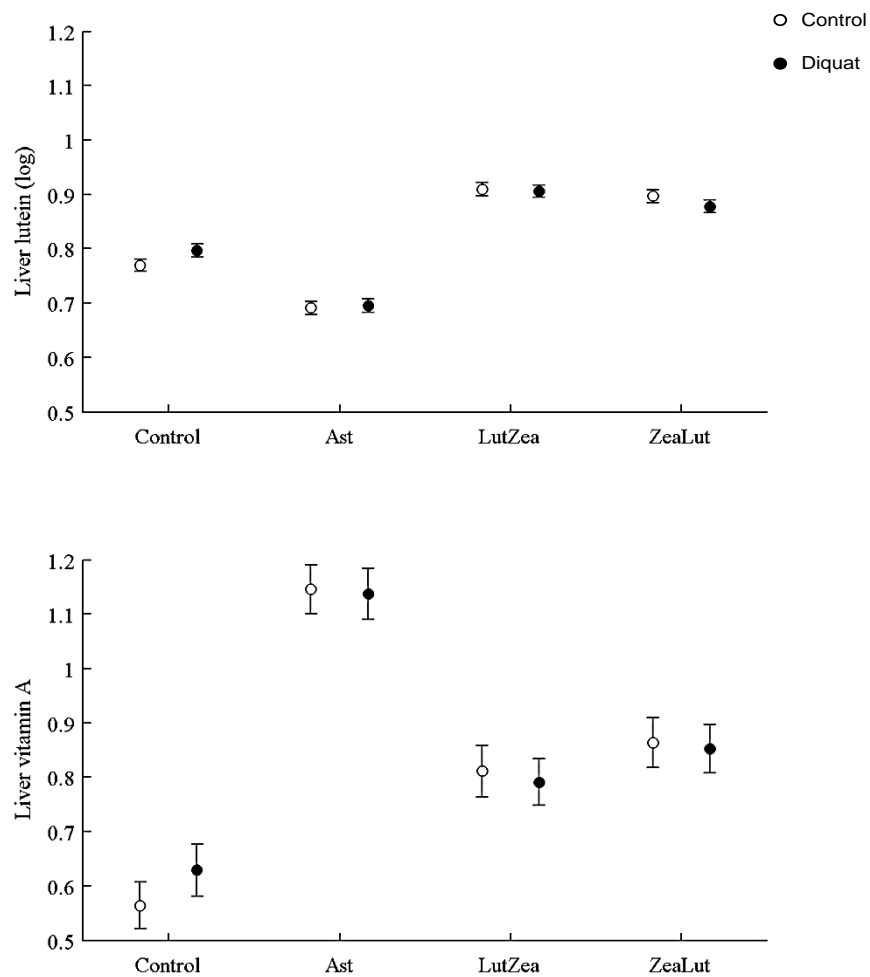

**Figure 5SM:** Levels of lutein and total vitamin A (free and esterified retinol) in liver after diquat exposure depending on the carotenoid treatment. Least squared means  $\pm$  se from the models (Methods and table 3).

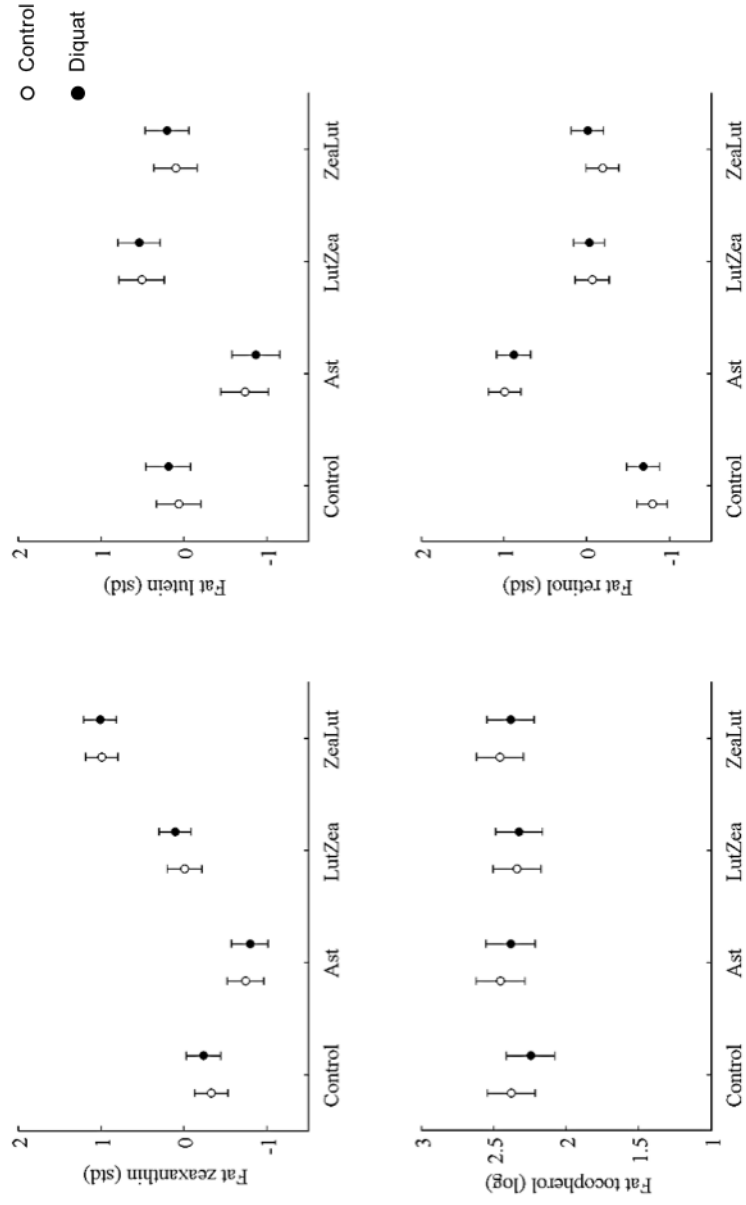

**Figure 6SM:** Levels of carotenoids and vitamins in subcutaneous fat after diquat exposure depending on the carotenoid treatment. Least squared means  $\pm$  se from the models (see Methods and table 3).

**Table 15M:** Raw data for carotenoids and vitamins (nmol/ml) in plasma throughout the study. The effects were provided by the models (see table 2). TxC: Time x carotenoid interaction; ns: No significant differences ( $p > 0.10$ ). Sample size: time 0: N= 173; time 48: N= 173; and time 82: N= 86 (in time 82, diquat birds were discarded, see methods).

|                   | Time | Control (mean $\pm$ sd) | Ast (mean $\pm$ sd) | LutZea (mean $\pm$ sd) | Zealut (mean $\pm$ sd) | Effect |
|-------------------|------|-------------------------|---------------------|------------------------|------------------------|--------|
| <b>Lutein</b>     | 0    | 22.57 $\pm$ 5.45        | 21.52 $\pm$ 5.54    | 20.34 $\pm$ 6.42       | 20.16 $\pm$ 6.38       |        |
|                   | 48   | 10.68 $\pm$ 2.87        | 6.56 $\pm$ 1.48     | 16.09 $\pm$ 6.10       | 12.65 $\pm$ 3.98       | TxC    |
|                   | 82   | 9.48 $\pm$ 1.69         | 6.52 $\pm$ 0.75     | 16.86 $\pm$ 3.55       | 13.74 $\pm$ 2.45       |        |
| <b>Zeaxanthin</b> | 0    | 10.96 $\pm$ 2.32        | 10.64 $\pm$ 1.74    | 10.33 $\pm$ 2.46       | 10.06 $\pm$ 2.30       |        |
|                   | 48   | 7.64 $\pm$ 1.99         | 6.25 $\pm$ 1.58     | 13.37 $\pm$ 5.13       | 24.37 $\pm$ 9.20       | TxC    |
|                   | 82   | 6.74 $\pm$ 1.07         | 6.59 $\pm$ 0.93     | 13.56 $\pm$ 3.28       | 25.88 $\pm$ 5.07       |        |
| <b>Tocopherol</b> | 0    | 22.35 $\pm$ 9.67        | 22.73 $\pm$ 6.66    | 21.18 $\pm$ 8.15       | 21.37 $\pm$ 9.49       |        |
|                   | 48   | 9.08 $\pm$ 3.29         | 9.30 $\pm$ 3.24     | 10.50 $\pm$ 4.65       | 11.83 $\pm$ 4.70       | TxC    |
|                   | 82   | 11.02 $\pm$ 2.68        | 11.02 $\pm$ 2.56    | 12.60 $\pm$ 3.63       | 14.91 $\pm$ 3.99       |        |
| <b>Retinol</b>    | 0    | 23.89 $\pm$ 3.22        | 24.05 $\pm$ 4.21    | 24.08 $\pm$ 4.45       | 22.92 $\pm$ 3.57       |        |
|                   | 48   | 22.11 $\pm$ 3.42        | 23.32 $\pm$ 3.62    | 23.78 $\pm$ 4.56       | 23.80 $\pm$ 4.49       | ns     |
|                   | 82   | 25.74 $\pm$ 4.71        | 27.59 $\pm$ 4.44    | 27.01 $\pm$ 3.94       | 27.42 $\pm$ 4.38       |        |

**Table 2SM:** Raw data for carotenoids and vitamins (nmol/g) in ornaments after the diquat exposure. The effects were provided by the models (see tables 3 and 4). C: Group of carotenoid supplement; DxC: Diquat x carotenoid interaction; D: Diquat treatment; S: Sex

|                  |                           | Control (mean ± sd) | Ast (mean ± sd) | LutZea (mean ± sd) | ZeaLut (mean ± sd) | Effect          |      |
|------------------|---------------------------|---------------------|-----------------|--------------------|--------------------|-----------------|------|
| <b>Eye rings</b> | <i>Astaxanthin</i>        | Control             | 66.68 ± 38.04   | 69.64 ± 28.80      | 113.57 ± 63.17     | 168.45 ± 74.50  |      |
|                  |                           | Diquat              | 61.52 ± 32.93   | 44.31 ± 20.24      | 103.46 ± 53.79     | 225.62 ± 141.05 | DxC  |
|                  | <i>Papilioerythrinone</i> | Control             | 7.63 ± 4.31     | 3.73 ± 2.42        | 16.59 ± 8.45       | 12.91 ± 5.26    | C, S |
|                  |                           | Diquat              | 6.30 ± 3.77     | 2.69 ± 2.01        | 16.65 ± 10.20      | 16.60 ± 10.55   |      |
|                  | <i>Tocopherol</i>         | Control             | 63.91 ± 69.12   | 62.12 ± 23.49      | 45.10 ± 18.32      | 54.61 ± 20.44   | DxC  |
|                  |                           | Diquat              | 39.21 ± 15.31   | 50.25 ± 16.65      | 45.48 ± 14.22      | 58.56 ± 19.50   |      |
| <b>Bill</b>      | <i>Astaxanthin</i>        | Control             | 156.80 ± 76.32  | 100.93 ± 36.08     | 373.51 ± 148.63    | 444.05 ± 287.12 | DxC  |
|                  |                           | Diquat              | 148.61 ± 75.94  | 102.73 ± 50.98     | 224.45 ± 106.71    | 517.99 ± 276.06 |      |
|                  | <i>Papilioerythrinone</i> | Control             | 15.10 ± 9.85    | 6.02 ± 3.87        | 52.31 ± 31.08      | 26.06 ± 14.90   | C, S |
|                  |                           | Diquat              | 13.08 ± 6.36    | 4.72 ± 2.84        | 35.03 ± 24.01      | 32.67 ± 15.41   |      |
|                  | <i>Tocopherol</i>         | Control             | 84.42 ± 20.90   | 88.06 ± 23.40      | 91.98 ± 26.96      | 82.22 ± 26.64   | DxC  |
|                  |                           | Diquat              | 65.46 ± 25.05   | 87.06 ± 28.84      | 71.20 ± 30.59      | 89.90 ± 28.68   |      |
| <b>Legs</b>      | <i>Astaxanthin</i>        | Control             | 49.07 ± 41.32   | 41.68 ± 25.82      | 71.45 ± 22.61      | 106.47 ± 70.17  | C, S |
|                  |                           | Diquat              | 36.64 ± 24.77   | 40.88 ± 49.75      | 60.27 ± 41.63      | 107.89 ± 70.37  |      |
|                  | <i>Papilioerythrinone</i> | Control             | 6.07 ± 3.75     | 4.41 ± 2.77        | 10.25 ± 2.55       | 8.29 ± 4.32     | C, S |
|                  |                           | Diquat              | 5.12 ± 2.47     | 3.51 ± 4.48        | 9.71 ± 5.74        | 8.97 ± 7.54     |      |
|                  | <i>Tocopherol</i>         | Control             | 53.78 ± 15.96   | 54.68 ± 11.53      | 46.26 ± 12.59      | 54.69 ± 16.50   | C, S |
|                  |                           | Diquat              | 47.31 ± 12.84   | 48.53 ± 16.14      | 48.85 ± 16.19      | 55.73 ± 19.75   |      |



**Table 3SM:** Raw data for carotenoids and vitamins in plasma (nmol/mL), liver and fat (nmol/g) after the diquat exposure. The effects were provided by the models (see tables 3 and 4). C: Group of carotenoid supplement; Dx: Diquat x carotenoid interaction; S: Sex; ns: No significant differences.

|                        |                   | Control (mean ± sd) | Ast (mean ± sd)  | LutZea (mean ± sd) | Zealut (mean ± sd) | Effect       |
|------------------------|-------------------|---------------------|------------------|--------------------|--------------------|--------------|
| <b>Plasma</b>          | <b>Lutein</b>     | Control             | 9.48 ± 1.69      | 6.52 ± 0.75        | 16.86 ± 3.55       | 13.74 ± 2.45 |
|                        |                   | Diquat              | 9.45 ± 1.66      | 6.55 ± 0.77        | 15.03 ± 4.23       | 12.80 ± 2.67 |
|                        | <b>Zeaxanthin</b> | Control             | 6.74 ± 1.07      | 6.59 ± 0.93        | 13.56 ± 3.28       | 25.88 ± 5.07 |
|                        |                   | Diquat              | 6.79 ± 1.09      | 6.82 ± 1.31        | 12.66 ± 4.46       | 24.52 ± 6.12 |
|                        | <b>Retinol</b>    | Control             | 25.74 ± 4.71     | 27.59 ± 4.44       | 27.01 ± 3.94       | 27.42 ± 4.38 |
|                        |                   | Diquat              | 24.71 ± 4.41     | 26.07 ± 3.94       | 26.86 ± 3.02       | 27.45 ± 4.19 |
|                        | <b>Tocopherol</b> | Control             | 11.02 ± 2.68     | 11.02 ± 2.56       | 12.60 ± 3.63       | 14.91 ± 3.99 |
|                        |                   | Diquat              | 9.46 ± 3.65      | 11.14 ± 4.04       | 11.97 ± 3.95       | 13.71 ± 3.89 |
|                        | <b>Lutein</b>     | Control             | 5.75 ± 0.49      | 4.86 ± 0.36        | 8.31 ± 1.54        | 8.82 ± 1.99  |
|                        |                   | Diquat              | 5.70 ± 0.63      | 4.83 ± 0.39        | 8.14 ± 1.80        | 8.20 ± 2.22  |
|                        | <b>Zeaxanthin</b> | Control             | 4.16 ± 0.34      | 4.11 ± 0.48        | 6.52 ± 1.23        | 14.21 ± 3.80 |
|                        |                   | Diquat              | 4.11 ± 0.38      | 4.12 ± 0.53        | 6.29 ± 1.35        | 12.84 ± 4.45 |
| <b>Total vitamin A</b> | Control           | 389.28 ± 245.49     | 1392.40 ± 490.99 | 679.07 ± 237.45    | 814.33 ± 325.32    |              |
|                        | Diquat            | 449.32 ± 297.65     | 1374.66 ± 682.11 | 618.66 ± 269.50    | 765.81 ± 399.72    |              |
| <b>Tocopherol</b>      | Control           | 6.02 ± 1.69         | 6.67 ± 2.67      | 6.75 ± 2.66        | 9.03 ± 2.52        |              |
|                        | Diquat            | 4.71 ± 1.05         | 6.45 ± 2.68      | 6.65 ± 2.63        | 8.10 ± 3.76        |              |
| <b>Lutein</b>          | Control           | 17.74 ± 12.92       | 21.78 ± 13.77    | 25.31 ± 12.53      | 18.54 ± 13.63      |              |
|                        | Diquat            | 18.19 ± 11.16       | 19.95 ± 9.77     | 20.79 ± 16.24      | 21.46 ± 13.70      |              |
| <b>Zeaxanthin</b>      | Control           | 11.56 ± 8.25        | 15.37 ± 9.46     | 16.30 ± 7.63       | 16.07 ± 11.12      |              |
|                        | Diquat            | 11.98 ± 7.17        | 14.43 ± 6.98     | 13.89 ± 10.51      | 18.75 ± 11.71      |              |
| <b>Retinol</b>         | Control           | 87.09 ± 64.70       | 196.73 ± 108.90  | 149.17 ± 79.36     | 108.26 ± 86.98     |              |
|                        | Diquat            | 98.36 ± 65.76       | 179.52 ± 99.98   | 116.00 ± 99.21     | 131.30 ± 90.95     |              |
| <b>Tocopherol</b>      | Control           | 381.21 ± 392.46     | 489.32 ± 599.44  | 328.65 ± 297.64    | 319.61 ± 260.11    |              |
|                        | Diquat            | 267.97 ± 283.51     | 396.92 ± 341.49  | 318.61 ± 378.15    | 373.70 ± 384.49    |              |

**Table 4SM:** Raw data for oxidative stress biomarkers in blood and other tissues at the end of the study after diquat treatment. The effects were provided by the models (see tables 3 and 4). C: Group of carotenoid supplement; D: Diquat treatment; DXcXS; Diquat x carotenoid x sex interaction; DxS: Diquat x Sex interaction.

|                                                             | Sex     | Control (mean ± sd) | Ast (mean ± sd) | LutZea (mean ± sd) | Zealut (mean ± sd) | Effect         |
|-------------------------------------------------------------|---------|---------------------|-----------------|--------------------|--------------------|----------------|
| <b>Resistance to oxidative stress in erythrocytes (min)</b> | Control | 101.38 ± 10.4       | 106.25 ± 11.89  | 103.67 ± 12.093    | 103.13 ± 11.64     | D              |
|                                                             | Diquat  | 100.2 ± 11.7        | 97.211 ± 10.04  | 100 ± 8.56         | 99.3 ± 9.739       |                |
| <b>Plasma TRG-MDA-corrected (µM)</b>                        | Male    | Control             | 3.387 ± 0.687   | 2.954 ± 0.573      | 3.311 ± 0.490      | 3.458 ± 0.965  |
|                                                             |         | Diquat              | 3.879 ± 0.521   | 3.840 ± 0.475      | 4.057 ± 0.503      | 4.102 ± 0.824  |
|                                                             | Female  | Control             | 3.660 ± 2.374   | 3.012 ± 0.514      | 3.114 ± 0.543      | 3.408 ± 0.615  |
|                                                             |         | Diquat              | 4.619 ± 1.894   | 4.330 ± 1.550      | 4.159 ± 1.337      | 4.517 ± 2.523  |
| <b>UA-ALB-corrected PLAOX (mmol/L)</b>                      | Male    | Control             | 0.008 ± 0.089   | 0.079 ± 0.125      | -0.038 ± 0.103     | -0.026 ± 0.102 |
|                                                             |         | Diquat              | 0.020 ± 0.072   | 0.104 ± 0.114      | 0.007 ± 0.080      | -0.036 ± 0.097 |
|                                                             | Female  | Control             | 0.001 ± 0.160   | -0.008 ± 0.091     | -0.047 ± 0.078     | -0.011 ± 0.176 |
|                                                             |         | Diquat              | -0.004 ± 0.076  | 0.060 ± 0.224      | -0.043 ± 0.042     | -0.043 ± 0.067 |
| <b>Liver MDA (µmol/g)</b>                                   | Male    | Control             | 0.026 ± 0.007   | 0.023 ± 0.006      | 0.026 ± 0.005      | 0.024 ± 0.005  |
|                                                             |         | Diquat              | 0.023 ± 0.006   | 0.023 ± 0.007      | 0.025 ± 0.007      | 0.026 ± 0.007  |
|                                                             | Female  | Control             | 0.025 ± 0.007   | 0.034 ± 0.010      | 0.033 ± 0.014      | 0.028 ± 0.004  |
|                                                             |         | Diquat              | 0.032 ± 0.006   | 0.030 ± 0.012      | 0.024 ± 0.007      | 0.028 ± 0.010  |
| <b>Heart MDA (µmol/g)</b>                                   | Control | 0.025 ± 0.005       | 0.023 ± 0.007   | 0.027 ± 0.01       | 0.026 ± 0.011      |                |
|                                                             | Diquat  | 0.024 ± 0.005       | 0.027 ± 0.005   | 0.023 ± 0.006      | 0.024 ± 0.005      |                |
